# Supplementary material
Source: PubMed Central journal article supplement (PMC8762035)
Supplement: thoraxjnl-2021-216949supp001.pdf [file thoraxjnl-2021-216949supp001.pdf]

## eSupplement

### *Clinical phenotypes and outcomes of SARS-CoV-2, influenza, RSV and seven other respiratory viruses: a retrospective study using complete hospital data*

|                                                                                                                                                                   |           |
|-------------------------------------------------------------------------------------------------------------------------------------------------------------------|-----------|
| <b>eMethods 1. Data collection and variable definition</b> .....                                                                                                  | <b>2</b>  |
| <b>eTable 1. ICD-10 codes for adult comorbidities</b> .....                                                                                                       | <b>4</b>  |
| <b>eTable 2. ICD-10 codes for pediatric comorbidities</b> .....                                                                                                   | <b>4</b>  |
| <b>eMethods 2. Definition of patient outcomes</b> .....                                                                                                           | <b>5</b>  |
| <b>eMethods 3. Handling of missing data</b> .....                                                                                                                 | <b>7</b>  |
| <b>eTable 3. Number and proportion of missing data per variable in the adult study cohort</b> .....                                                               | <b>8</b>  |
| <b>eFigure 1. Density distributions after multiple imputation by chained equations</b> .....                                                                      | <b>9</b>  |
| <b>eTable 4. Baseline characteristics for all ten virus groups of the adult cohort (Complete case analysis)</b> .....                                             | <b>10</b> |
| <b>eTable 5. Vital signs and laboratory parameters at admission for the adult study cohort (Complete case analysis)</b> .....                                     | <b>12</b> |
| <b>eFigure 2. Density curves for vital signs and laboratory parameters</b> .....                                                                                  | <b>14</b> |
| <b>eTable 6. Baseline characteristics, laboratory parameters and vital signs in the different virus groups of the adult cohort</b> .....                          | <b>15</b> |
| <b>eFigure 3. Presence of fever and dyspnea at admission in the adult and pediatric study cohort by virus group</b> .....                                         | <b>18</b> |
| <b>eFigure 4. Virus prediction models for SARS-CoV-2 compared to influenza (A), RSV (B) and other respiratory viruses (C)</b> .....                               | <b>19</b> |
| <b>eTable 7. Logistic regression estimates for the virus prediction models</b> .....                                                                              | <b>20</b> |
| <b>eTable 8. Sensitivity analyses for mortality and ICU-admission outcomes in the adult cohort</b> .....                                                          | <b>24</b> |
| <b>eTable 9. Age stratified logistic regression analysis of 30-day mortality in the adult cohort</b> .....                                                        | <b>26</b> |
| <b>eFigure 5. Unadjusted Kaplan Meier curve (A) and standardized survival function curve (B) for 30-90 day mortality in the adult study cohort</b> .....          | <b>27</b> |
| <b>eTable 10. Comparison of mortality hazard ratios for complete case and multiple imputed analysis in the adult cohort</b> .....                                 | <b>28</b> |
| <b>eFigure 6. Comparison of 30-day mortality, 90-day mortality and ICU-admission per calendar year in the adult influenza, RSV and other viruses groups</b> ..... | <b>29</b> |
| <b>References</b> .....                                                                                                                                           | <b>30</b> |

## eMethods 1. Data collection and variable definition

**PCR methodology:** Diagnostics for a narrow respiratory virus panel including influenza A virus (IAV), influenza B virus (IBV), and respiratory syncytial virus (RSV) were performed using in-house realtime PCR assays until 14 September 2014 when they were replaced by the Simplexa Flu A/B & RSV Kit (Focus Diagnostics Inc., Cypress (CA, USA)), which were in turn replaced by the Xpert Flu/RSV ((Cepheid, Solna, Sweden) from 15 May 2019<sup>1</sup>. An extended respiratory virus panel, which included the four seasonal CoVs (229E, NL63, OC43, and HKU1) as well as adenovirus (AdV), enterovirus (EV), human bocavirus (BoV), human metapneumovirus (MPV), parainfluenza virus (PIV) 1, 2, and 3, and rhinovirus (RV), was performed using in-house realtime PCR assays (Tiveljung-Lindell) until 5 November 2017 when they were replaced by the Allplex Respiratory Panels 2 and 3 (Seegene Inc., Seoul (South Korea)). The Allplex assay does not discriminate between the *Betacoronaviruses* OC43 and HKU1 but includes PIV4.

**Age on admission:** Approximated by the available data on year and month of birth, with the 1<sup>st</sup> of each month set as a fictional day of birth. In total, 200 individuals were excluded from the final analysis due to missing information on age. In all analyses adjusted for age, age was treated as a categorical variable (16-39, 40-49, 50-59, 60-69, 70-79 and  $\geq 80$ ).

**Body Mass Index (BMI):** Based on the latest height and weight data available and was only calculated for the adult ( $\geq 16$  years) study cohort. Normoweight was defined as a BMI of 18.5-24.9 kg/m<sup>2</sup>, underweight  $< 18.5$  kg/m<sup>2</sup>, overweight 25-29.9 kg/m<sup>2</sup>, obese  $\geq 30$  kg/m<sup>2</sup>. In all analyses adjusted for BMI, BMI was treated as a categorical variable (underweight, normoweight, overweight and obese).

**Charlson Comorbidity Index (CCI) score and Elixhauser Comorbidity Index (ECI):** Charlson Comorbidity Index (CCI) score and Elixhauser Comorbidity Index (ECI) score were calculated using the comorbidity package in R based on the Quan et al. and van Walraven version, respectively<sup>2-4</sup>. The CCI and ECI scores were presented both as continuous and categorical variables (CCI: 0-1, 2-4,  $\geq 5$  and ECI:  $\leq 0$ , 1-10,  $\geq 11$ ) in comparisons between the different virus groups.

**The specific comorbidities** in the adult as well as the pediatric study cohort were defined according to supplemental table 1 and 2. Each comorbidity category was defined as having any of the comorbidity specific ICD-10 codes recorded from five years before until 24 hours after the admission time point.

**For laboratory parameters and vital signs**, the worst value (either highest or lowest) -24 hours to +24 hours from admission was used. Cut-offs for body temperature, respiratory rate, heart rate, blood pressure and WBC count were based on the Systemic Inflammatory Response Syndrome (SIRS) and Confusion-Respiration-Blood pressure-age 65 (CRB 65) scoring systems. For respiratory rate, the highest respiratory rate was recorded for each healthcare episode, irrespective of oxygen supplementation or not. **The lowest**

**peripheral saturation, SpO<sub>2</sub>**, was recorded for each healthcare episode, irrespective of oxygen supplementation or not and the worst SpO<sub>2</sub>/FiO<sub>2</sub> was calculated by extracting the level of oxygen supplementation (L/min) and using the same FiO<sub>2</sub> assumptions as in Valik et al.<sup>5</sup> SpO<sub>2</sub>/FiO<sub>2</sub> ratio cutoffs were based on SpO<sub>2</sub>/FiO<sub>2</sub> ratios corresponding to a previously published conversion equation.<sup>6</sup>

**eTable 1. ICD-10 codes for adult comorbidities**

| <b>Comorbidity category</b> | <b>ICD-10 codes<sup>a</sup></b>                                                                                                                             |
|-----------------------------|-------------------------------------------------------------------------------------------------------------------------------------------------------------|
| Diabetes mellitus           | E10-E14                                                                                                                                                     |
| Hypertension                | I10-I15                                                                                                                                                     |
| Cardiac disease             | I11, I13, I2, I42, I50, I6                                                                                                                                  |
| Chronic pulmonary disease   | J40-J47                                                                                                                                                     |
| Chronic kidney failure      | N18-N19                                                                                                                                                     |
| Malignancy                  | C                                                                                                                                                           |
| Immunosuppression           | C0, C1, C2, C30-C34, C37-C39, C4, C5, C6, C7, C80, D70-D72, D73.0, D80, D81, D83, D84, Z94.0, Z94.1, Z94.2, Z94.3, Z94.4, Z94.6, Z94.8, Z94.9, B2, Z21, N18 |

<sup>a</sup> The shortest text-pattern for identification of included ICD-10 codes are listed

**eTable 2. ICD-10 codes for pediatric comorbidities**

| <b>Comorbidity category</b>                            | <b>ICD-10 codes<sup>a</sup></b>                                                                                   |
|--------------------------------------------------------|-------------------------------------------------------------------------------------------------------------------|
| Prematurity and perinatal diseases                     | P07, P27, P29                                                                                                     |
| Chronic cardiac diseases                               | I05-I08, I20-I22, I24-I28, I34-I37, I42, I44-I50                                                                  |
| Chronic respiratory diseases                           | J43-J47, J6, J7, J80-J84, J92-J96, J98-J99                                                                        |
| Congenital malformations and chromosomal abnormalities | Q0, Q2, Q30-Q34, Q60-Q64, Q9                                                                                      |
| Solid tumor                                            | C0-C7, C80                                                                                                        |
| Haematooncological malignancy                          | C81-C96                                                                                                           |
| Immunosuppression                                      | D70-D72, D73.0, D80, D81, D83, D84, Z51.0, Z51.1, Z94.0, Z94.1, Z94.2, Z94.3, Z94.4, Z94.6, Z94.8, Z94.9, B2, Z21 |

<sup>a</sup> The shortest text-pattern for identification of included ICD-10 codes are listed

## **eMethods 2. Definition of patient outcomes**

**Length of stay (LOS)** was defined as the time from first admission time point (either emergency department arrival or direct hospital admission) until discharge time point. LOS was compared between the virus groups using a negative binomial regression model, with ratios presented as rate ratios with 95% confidence interval.

**30-day mortality** was defined as all-cause mortality from the admission time point and 30 days forward, irrespective of discharge status. 30-day mortality was analyzed as a time-to-event outcome. Complete outcome ascertainment was possible as data on mortality in the electronic health records is continuously updated based on the Swedish population register. Persons with a follow-up time less than 30 days were excluded from the analysis. Ratios were presented as hazard ratios with 95% confidence interval.

**90-day mortality** was defined as all-cause mortality from the admission time point and 90 days forward, irrespective of discharge status. 90-day mortality was analyzed as a time-to-event outcome. Complete outcome ascertainment was possible as data on mortality in the electronic health records is continuously updated based on the Swedish population register. Persons with a follow-up time less than 90 days were excluded from the analysis. Ratios were presented as hazard ratios with 95% confidence interval.

**31-90-day mortality** was defined as all-cause mortality from 30 days after the admission time point and 60 days forward, irrespective of discharge status. 31-90-day mortality was analyzed as a time-to-event outcome. Complete outcome ascertainment was possible as data on mortality in the electronic health records is continuously updated based on the Swedish population register. Persons with a follow-up time less than 90 days were excluded from the analysis. Ratios were presented as hazard ratios with 95% confidence interval.

**ICU-admission** was defined as care units able to provide inotropic and non-invasive or invasive respiratory treatment, including an intensive care unit (ICU), intermediate care unit (IMU) or extracorporeal membrane oxygenation (ECMO) unit. The IMU can provide noninvasive ventilation, invasive/non-invasive monitoring and have higher nurse staffing compared to general wards, but less compared to the ICU. ICU-admission was analyzed as a time-to-event outcome with 30 days follow-up time, and patients were censored upon hospital discharge or death. Persons with a follow-up time less than 30 days were excluded from the analysis. Ratios were presented as hazard ratios with 95% confidence interval.

**LOS at ICU** was defined as the time from ICU admission time point until ICU discharge time point. If several ICU-admissions during the same healthcare episode were recorded the total time only in the ICU was calculated. LOS at ICU was compared between the virus groups using a negative binomial regression model, with ratios presented as rate ratios with 95% confidence interval.

**30-day mortality in ICU-admitted cohort** was defined as all-cause mortality from the first ICU admission time point and 30 days forward, irrespective of discharge status. ICU 30-day mortality was analyzed as a time-to-event outcome. Complete outcome ascertainment was possible as data on mortality in the electronic health records is continuously updated based on the Swedish population register. Persons with a follow-up time less than 30 days were excluded from the analysis. Ratios were presented as hazard ratios with 95% confidence interval.

**Acute Myocardial Injury (AMI)** was defined as cardiac Troponin T > 50 ng/ml within 30 days after admission time point. AMI was analyzed as a time-to-event outcome with 30 days follow-up time, and patients were censored upon hospital discharge or death. Persons with a follow-up time less than 30 days were excluded from the analysis. Ratios were presented as hazard ratios with 95% confidence interval.

**Acute Kidney Injury (AKI)** was based on the KDIGO criteria but without the urine volume measurements due to inconsistent recording in the EHR system. No staging of the AKI was done, thus the criteria used for AKI was >1.5 times baseline within the last 7 days or an increase in serum creatinine by 26.5 µmol/L more within the last 48 hours. The baseline creatinine was defined as the best reported value reported within 90 days prior to the admission time point and if no such value was reported prior to hospital admission, the first creatinine measurement was used. AKI was analyzed as a time-to-event outcome with 30 days follow-up time, and patients were censored upon hospital discharge or death. Persons with a follow-up time less than 30 days were excluded from the analysis. Ratios were presented as hazard ratios with 95% confidence interval.

**Pulmonary embolism (PE)** was defined as an I26 ICD-10 code registered within the healthcare episode, irrespective of length of the health care episode. PE was analyzed using a logistic regression model and ratios were presented as odds ratios with 95% confidence interval.

**Hospital Onset Bacteremia (HOB)** was defined as significant findings in blood cultures taken >48 hours after hospital admission, with the same definition of significant bloodstream infections as described by Valik et al.<sup>5</sup> HOB was analyzed as a time-to-event outcome with 30 days follow-up time, and patients were censored upon hospital discharge or death. Persons with a follow-up time less than 30 days were excluded from the analysis. Ratios were presented as hazard ratios with 95% confidence interval.

### **eMethods 3. Handling of missing data**

Missing data for BMI, body temperature, respiratory rate, SpO<sub>2</sub>, SpO<sub>2</sub>/FiO<sub>2</sub>, Heart rate, systolic and diastolic blood pressure, WBC count, CRP, creatinine value and platelet count at admission were considered missing at random (MAR) and multiple imputation by chained equations (MICE) were used with predictive mean matching in the mice R-package.<sup>7</sup> All other baseline characteristic and outcome variables were used as predictor variables. Fifty imputed datasets ( $m = 50$ ) were created with 20 iterations ( $\text{maxit} = 20$ ) and the final estimates in the analyses were obtained using Rubin's rules.<sup>8</sup> The number and proportions of missing data points per variable are available in eTable 3. The density distributions of the 50 imputed datasets compared to the complete case data are found in eFigure 1.

**eTable 3. Number and proportion of missing data per variable in the adult study cohort**

| <b>Variable</b>          | <b>Number of (%) missing values</b> |
|--------------------------|-------------------------------------|
| BMI                      | 813 (13)                            |
| Body temperature         | 292 (5)                             |
| Respiratory rate         | 463 (7)                             |
| SpO2                     | 300 (5)                             |
| SpO2/FiO2                | 306 (5)                             |
| Heart rate               | 300 (5)                             |
| Systolic blood pressure  | 324 (5)                             |
| Diastolic blood pressure | 337 (5)                             |
| WBC count                | 360 (6)                             |
| C-reactive protein       | 375 (6)                             |
| Creatinine               | 453 (7)                             |
| Platelet count           | 386 (6)                             |

**Abbreviations:** BMI: Body Mass Index, SpO2: Peripheral capillary oxygen saturation, FiO2: Fraction of inspired oxygen, WBC: White blood cells



**eFigure 1. Density distributions after multiple imputation by chained equations**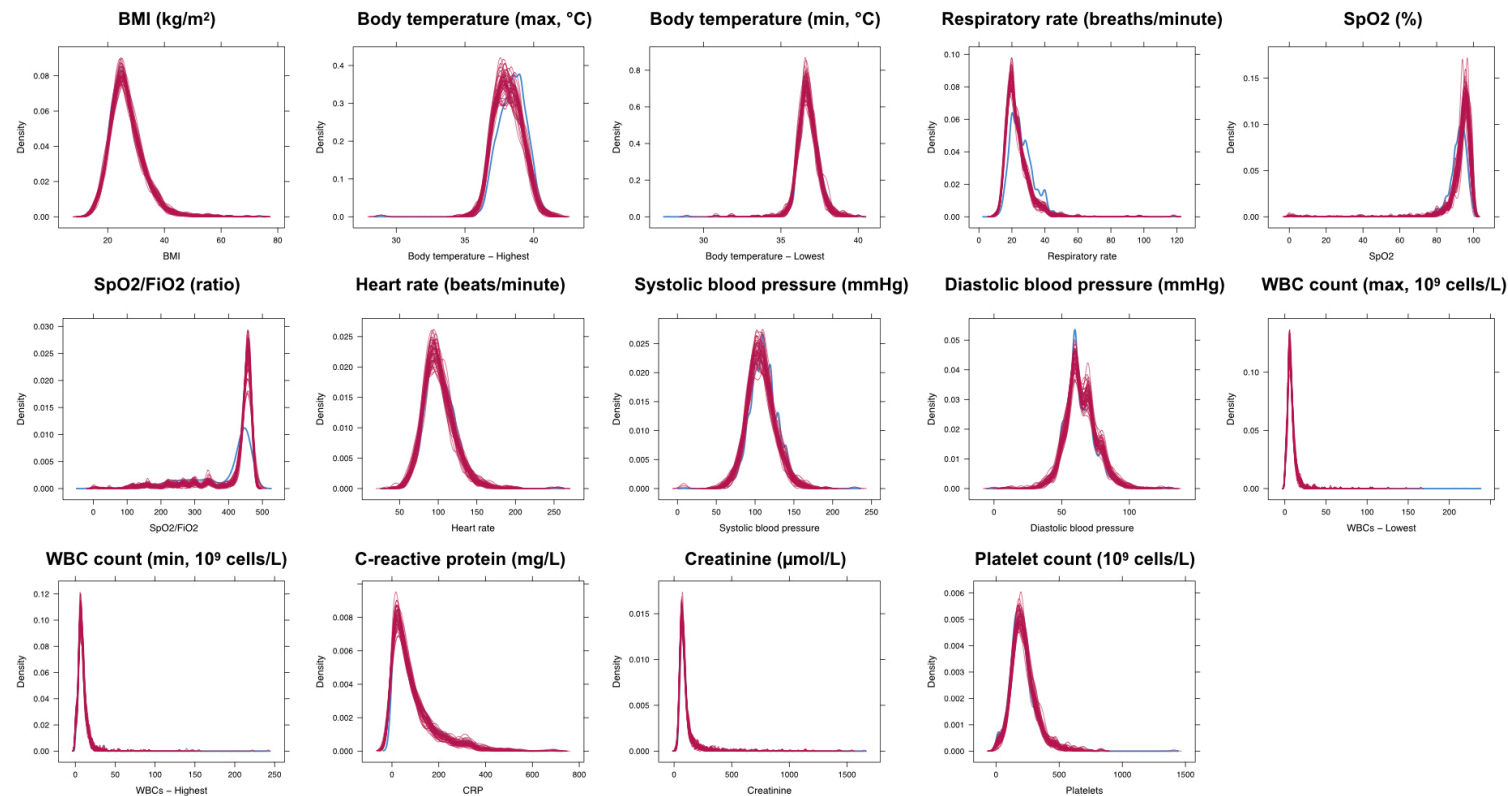

**Note:** Distribution of 50 imputed dataset variables (magenta lines) compared to complete case dataset (blue line). All variables were imputed using predictive mean matching (PMM) and 20 iterations were performed for each imputed dataset.

**Abbreviations:** BMI: Body Mass Index, SpO<sub>2</sub>: Peripheral capillary oxygen saturation, FiO<sub>2</sub>: Fraction of inspired oxygen, WBC: White blood cells

**eTable 4. Baseline characteristics for all ten virus groups of the adult cohort (Complete case analysis)**

| Variable                                   | Virus group (No. health care episodes) |                  |               |               |               |               |               |               |               |               | P-value <sup>a</sup> |
|--------------------------------------------|----------------------------------------|------------------|---------------|---------------|---------------|---------------|---------------|---------------|---------------|---------------|----------------------|
|                                            | SARS-CoV-2 (1721)                      | Influenza (2468) | RSV (624)     | RV (682)      | EV (30)       | PIV (247)     | MPV (211)     | SCoV (183)    | AdV (43)      | BoV (30)      |                      |
| <b>Male sex, n (%)</b>                     | 1010<br>(59)                           | 1194<br>(48)     | 275<br>(44)   | 406<br>(60)   | 16<br>(53)    | 137<br>(56)   | 100<br>(47)   | 99<br>(54)    | 24<br>(56)    | 15<br>(50)    | <0.001               |
| <b>Age, median (IQR), years</b>            | 58<br>(42-71)                          | 68<br>(51-79)    | 71<br>(60-81) | 58<br>(37-71) | 55<br>(35-67) | 65<br>(50-75) | 66<br>(51-75) | 60<br>(39-73) | 42<br>(27-60) | 64<br>(50-75) | <0.001               |
| 16-39, n (%)                               | 377<br>(22)                            | 401<br>(16)      | 36<br>(6)     | 198<br>(29)   | 12<br>(40)    | 37<br>(15)    | 28<br>(13)    | 47<br>(26)    | 21<br>(49)    | 4<br>(13)     |                      |
| 40-49, n (%)                               | 212<br>(12)                            | 186<br>(8)       | 33<br>(5)     | 61<br>(9)     | 2<br>(7)      | 24<br>(10)    | 19<br>(9)     | 21<br>(11)    | 5<br>(12)     | 4<br>(13)     |                      |
| 50-59, n (%)                               | 345<br>(20)                            | 325<br>(13)      | 77<br>(12)    | 96<br>(14)    | 3<br>(10)     | 36<br>(15)    | 35<br>(17)    | 22<br>(12)    | 5<br>(12)     | 3<br>(10)     |                      |
| 60-69, n (%)                               | 334<br>(19)                            | 404<br>(16)      | 130<br>(21)   | 123<br>(18)   | 7<br>(23)     | 56<br>(23)    | 42<br>(20)    | 28<br>(15)    | 8<br>(19)     | 7<br>(23)     | <0.001               |
| 70-79, n (%)                               | 209<br>(12)                            | 546<br>(22)      | 167<br>(27)   | 140<br>(21)   | 4<br>(13)     | 57<br>(23)    | 53<br>(25)    | 42<br>(23)    | 3<br>(7)      | 10<br>(33)    |                      |
| ≥80, n (%)                                 | 244<br>(14)                            | 606<br>(25)      | 181<br>(29)   | 64<br>(9)     | 2<br>(7)      | 37<br>(15)    | 34<br>(16)    | 23<br>(13)    | 1<br>(2)      | 2<br>(7)      | <0.001               |
| <b>BMI, median (IQR), kg/m<sup>2</sup></b> | 27<br>(24-31)                          | 25<br>(22-29)    | 25<br>(22-29) | 24<br>(21-28) | 24<br>(21-27) | 24<br>(21-28) | 26<br>(22-30) | 25<br>(22-28) | 25<br>(23-28) | 24<br>(20-28) | <0.001               |
| Normoweight, n (%)                         | 393<br>(30)                            | 955<br>(43)      | 261<br>(44)   | 316<br>(51)   | 14<br>(50)    | 106<br>(45)   | 82<br>(41)    | 69<br>(39)    | 18<br>(46)    | 14<br>(52)    | [[SEP]]              |
| Underweight, n (%)                         | 29<br>(2)                              | 122<br>(5)       | 37<br>(6)     | 61<br>(10)    | 2<br>(7)      | 25<br>(11)    | 9<br>(5)      | 13<br>(7)     | 2<br>(5)      | 2<br>(7)      |                      |
| Overweight, n (%)                          | 490<br>(38)                            | 695<br>(31)      | 166<br>(28)   | 151<br>(24)   | 7<br>(25)     | 71<br>(30)    | 55<br>(28)    | 61<br>(35)    | 10<br>(26)    | 6<br>(22)     | <0.001               |
| Obese, n (%)                               | 380<br>(29)                            | 450<br>(20)      | 127<br>(21)   | 97<br>(16)    | 5<br>(18)     | 32<br>(14)    | 53<br>(27)    | 32<br>(18)    | 9<br>(23)     | 5<br>(19)     |                      |
| N/A, n (%)                                 | 429<br>(25)                            | 246<br>(10)      | 33<br>(5)     | 57<br>(8)     | 2<br>(7)      | 13<br>(5)     | 12<br>(6)     | 8<br>(4)      | 4<br>(9)      | 3<br>(10)     |                      |
| <b>CCI-score, median (IQR), points</b>     | 1<br>(0-2)                             | 1<br>(0-3)       | 2<br>(1-4)    | 2<br>(1-3)    | 2<br>(0-3)    | 2<br>(1-3)    | 2<br>(1-4)    | 2<br>(1-3)    | 0<br>(0-2)    | 3<br>(2-6)    | <0.001               |
| 0-1, n (%)                                 | 1199<br>(70)                           | 1252<br>(51)     | 235<br>(38)   | 261<br>(38)   | 13<br>(43)    | 96<br>(39)    | 68<br>(32)    | 71<br>(39)    | 31<br>(72)    | 5<br>(17)     | [[SEP]]<0.001        |

| Variable                                           | SARS-CoV-2 (1721) | Influenza (2468) | RSV (624)   | RV (682)    | EV (30)     | PIV (247)   | MPV (211)   | SCoV (183)  | AdV (43)   | BoV (30)     | P-value <sup>a</sup> |
|----------------------------------------------------|-------------------|------------------|-------------|-------------|-------------|-------------|-------------|-------------|------------|--------------|----------------------|
| 2-4, n (%)                                         | 386<br>(22)       | 890<br>(36)      | 284<br>(46) | 305<br>(45) | 11<br>(37)  | 115<br>(47) | 104<br>(49) | 77<br>(42)  | 9<br>(21)  | 16<br>(53)   |                      |
| ≥5, n (%)                                          | 136<br>(8)        | 326<br>(13)      | 105<br>(17) | 116<br>(17) | 6<br>(20)   | 36<br>(15)  | 39<br>(18)  | 35<br>(19)  | 3<br>(7)   | 9<br>(30)    | <0.001               |
| <b>ECI-score, median (IQR), points</b>             | 0<br>(0-6)        | 5<br>(0-11)      | 9<br>(3-14) | 7<br>(3-12) | 3<br>(0-12) | 7<br>(3-12) | 9<br>(3-13) | 6<br>(3-12) | 0<br>(0-6) | 10<br>(5-16) | <0.001               |
| ≤0, n (%)                                          | 947<br>(55)       | 809<br>(33)      | 104<br>(17) | 158<br>(23) | 12<br>(40)  | 50<br>(20)  | 45<br>(21)  | 37<br>(20)  | 27<br>(63) | 2<br>(7)     |                      |
| 1-10, n (%)                                        | 493<br>(29)       | 1005<br>(41)     | 255<br>(41) | 264<br>(39) | 8<br>(27)   | 113<br>(46) | 82<br>(39)  | 87<br>(48)  | 10<br>(23) | 13<br>(43)   | <0.001               |
| ≥11, n (%)                                         | 281<br>(16)       | 654<br>(26)      | 265<br>(42) | 260<br>(38) | 10<br>(33)  | 84<br>(34)  | 84<br>(40)  | 59<br>(32)  | 6<br>(14)  | 15<br>(50)   |                      |
| Diabetes mellitus, n (%) <sup>b</sup>              | 392<br>(23)       | 467<br>(19)      | 107<br>(17) | 105<br>(15) | 3<br>(10)   | 37<br>(15)  | 55<br>(26)  | 27<br>(15)  | 2<br>(5)   | 8<br>(27)    | <0.001               |
| Hypertension, n (%) <sup>b</sup>                   | 660<br>(38)       | 907<br>(37)      | 246<br>(39) | 170<br>(25) | 6<br>(20)   | 75<br>(30)  | 87<br>(41)  | 49<br>(27)  | 1<br>(2)   | 11<br>(37)   | <0.001               |
| Cardiac disease, n (%) <sup>b</sup>                | 403<br>(23)       | 728<br>(29)      | 237<br>(38) | 178<br>(26) | 6<br>(20)   | 69<br>(28)  | 73<br>(35)  | 52<br>(28)  | 5<br>(12)  | 9<br>(30)    | <0.001               |
| Chronic pulmonary disease, n (%) <sup>b</sup>      | 252<br>(15)       | 518<br>(21)      | 171<br>(27) | 146<br>(21) | 5<br>(17)   | 49<br>(20)  | 55<br>(26)  | 42<br>(23)  | 2<br>(5)   | 7<br>(23)    | <0.001               |
| Chronic kidney failure, n (%) <sup>b</sup>         | 133<br>(8)        | 259<br>(10)      | 86<br>(14)  | 73<br>(11)  | 3<br>(10)   | 21<br>(9)   | 30<br>(14)  | 20<br>(11)  | 1<br>(2)   | 5<br>(17)    | <0.001               |
| Malignancy, n (%) <sup>b</sup>                     | 185<br>(11)       | 537<br>(22)      | 218<br>(35) | 282<br>(41) | 11<br>(37)  | 110<br>(45) | 75<br>(36)  | 64<br>(35)  | 11<br>(26) | 18<br>(60)   | <0.001               |
| Immunosuppression, n (%) <sup>b</sup>              | 314<br>(18)       | 791<br>(32)      | 295<br>(47) | 366<br>(54) | 14<br>(47)  | 135<br>(55) | 105<br>(50) | 103<br>(56) | 17<br>(40) | 21<br>(70)   | <0.001               |
| Any of the comorbidities above, n (%) <sup>b</sup> | 1014<br>(59)      | 1754<br>(71)     | 513<br>(82) | 541<br>(79) | 21<br>(70)  | 204<br>(83) | 177<br>(84) | 151<br>(83) | 17<br>(40) | 27<br>(90)   | <0.001               |

<sup>a</sup> Comparison of all virus groups using Chi-square test for nominal and Kruskal-Wallis test for continuous variables

<sup>b</sup> See eTable 1 for corresponding ICD-10 codes for each comorbidity category.

**Abbreviations:** SARS-CoV-2: Severe acute respiratory syndrome coronavirus 2, RSV: Respiratory syncytial virus, RV: Rhinovirus, EV: Enterovirus, PIV: Parainfluenzaviruses, MPV: Metapneumoviruses, sCoV: Seasonal coronavirus, AdV: Adenovirus, BoV: Bocavirus, CCI: Charlson Comorbidity Index, ECI: Elixhauser Comorbidity Index

eTable 5. Vital signs and laboratory parameters at admission for the adult study cohort (Complete case analysis)

| Variable                                                   | Virus group (No. health care episodes) |                  |             |             |             |             |             |             |             |             |
|------------------------------------------------------------|----------------------------------------|------------------|-------------|-------------|-------------|-------------|-------------|-------------|-------------|-------------|
|                                                            | SARS-CoV-2 (1721)                      | Influenza (2468) | RSV (624)   | RV (682)    | EV (30)     | PIV (247)   | MPV (211)   | SCoV (183)  | AdV (43)    | BoV (30)    |
| <b>Vital signs <sup>a</sup></b>                            | <b>median</b>                          |                  |             |             |             |             |             |             |             |             |
|                                                            | IQR                                    |                  |             |             |             |             |             |             |             |             |
|                                                            | prop. (%) tested                       |                  |             |             |             |             |             |             |             |             |
| <b>Temperature, °C <sup>b</sup></b>                        | <b>38.5</b>                            | <b>38.7</b>      | <b>38.4</b> | <b>38.2</b> | <b>38.0</b> | <b>38.4</b> | <b>38.5</b> | <b>38.3</b> | <b>38.6</b> | <b>38.0</b> |
|                                                            | 37.7-39.2                              | 38.0-39.3        | 37.7-39.1   | 37.6-39.0   | 37.6-39.5   | 37.6-39.0   | 37.6-39.1   | 37.4-38.9   | 37.8-39.2   | 37.4-38.8   |
|                                                            | 91                                     | 97               | 98          | 97          | 100         | 98          | 98          | 98          | 100         | 100         |
| <b>Respiratory rate, breaths/min <sup>b</sup></b>          | <b>26</b>                              | <b>24</b>        | <b>25</b>   | <b>24</b>   | <b>22</b>   | <b>24</b>   | <b>25</b>   | <b>24</b>   | <b>21</b>   | <b>24</b>   |
|                                                            | 22-31                                  | 20-30            | 20-30       | 20-30       | 20-24       | 20-30       | 22-32       | 20-30       | 20-28       | 20-30       |
|                                                            | 90                                     | 94               | 95          | 92          | 100         | 92          | 94          | 92          | 93          | 93          |
| <b>SpO<sub>2</sub>, % <sup>c, d</sup></b>                  | <b>92</b>                              | <b>92</b>        | <b>92</b>   | <b>93</b>   | <b>94</b>   | <b>93</b>   | <b>92</b>   | <b>94</b>   | <b>95</b>   | <b>93</b>   |
|                                                            | 90-95                                  | 89-95            | 88-94       | 90-96       | 92-95       | 89-95       | 89-94       | 91-96       | 93-97       | 89-95       |
|                                                            | 91                                     | 97               | 98          | 97          | 100         | 97          | 97          | 98          | 100         | 100         |
| <b>SpO<sub>2</sub>/FiO<sub>2</sub>, ratio <sup>c</sup></b> | <b>433</b>                             | <b>429</b>       | <b>419</b>  | <b>438</b>  | <b>443</b>  | <b>433</b>  | <b>429</b>  | <b>445</b>  | <b>452</b>  | <b>443</b>  |
|                                                            | 297-448                                | 310-448          | 297-448     | 339-452     | (431-452)   | 308-448     | 281-448     | 349-457     | 438-460     | 298-452     |
|                                                            | 91                                     | 96               | 98          | 97          | 100         | 97          | 97          | 98          | 100         | 93          |
| <b>Heart rate, beats/min <sup>b</sup></b>                  | <b>98</b>                              | <b>102</b>       | <b>105</b>  | <b>105</b>  | <b>106</b>  | <b>104</b>  | <b>105</b>  | <b>100</b>  | <b>107</b>  | <b>105</b>  |
|                                                            | 87-109                                 | 90-117           | 90-120      | 91-120      | 89-115      | 94-119      | 93-120      | 91-115      | 98-120      | 87-118      |
|                                                            | 91                                     | 97               | 98          | 97          | 100         | 97          | 97          | 98          | 100         | 100         |
| <b>Systolic BP, mm Hg <sup>c</sup></b>                     | <b>110</b>                             | <b>110</b>       | <b>112</b>  | <b>108</b>  | <b>107</b>  | <b>110</b>  | <b>110</b>  | <b>110</b>  | <b>110</b>  | <b>109</b>  |
|                                                            | 102-122                                | 100-122          | 100-127     | 97-120      | 99-120      | 100-121     | 100-125     | 99-120      | 100-116     | 100-120     |
|                                                            | 90                                     | 96               | 98          | 96          | 100         | 98          | 97          | 99          | 91          | 100         |
| <b>Diastolic BP, mm Hg <sup>c</sup></b>                    | <b>63</b>                              | <b>60</b>        | <b>60</b>   | <b>60</b>   | <b>61</b>   | <b>60</b>   | <b>60</b>   | <b>60</b>   | <b>60</b>   | <b>60</b>   |
|                                                            | 58-70                                  | 55-70            | 56-70       | 55-70       | 56-70       | 55-70       | 56-70       | 56-70       | 58-70       | 53-70       |
|                                                            | 90                                     | 96               | 98          | 95          | 100         | 98          | 96          | 99          | 91          | 100         |
| <b>Laboratory parameters <sup>a</sup></b>                  |                                        |                  |             |             |             |             |             |             |             |             |
| <b>Highest WBC count, 10<sup>9</sup> cells/L</b>           | <b>6.9</b>                             | <b>7.7</b>       | <b>9.1</b>  | <b>10.1</b> | <b>10.4</b> | <b>8.8</b>  | <b>8.6</b>  | <b>10.0</b> | <b>9.4</b>  | <b>11.5</b> |
|                                                            | 5.2-9.4                                | 5.5-10.5         | 6.5-12.2    | 5.9-14.4    | 5.8-14.6    | 5.4-12.6    | 5.9-13      | 6.2-13.8    | 6.2-13.4    | 8.2-15.9    |
|                                                            | 89                                     | 96               | 97          | 96          | 97          | 97          | 96          | 97          | 98          | 97          |
| <b>Lowest WBC count, 10<sup>9</sup> cells/L</b>            | <b>6.3</b>                             | <b>6.7</b>       | <b>8.1</b>  | <b>8.4</b>  | <b>10.4</b> | <b>7.1</b>  | <b>7.2</b>  | <b>8.2</b>  | <b>7.3</b>  | <b>9.9</b>  |
|                                                            | 4.6-8.6                                | 4.7-9.1          | 5.4-10.6    | 5.0-12.5    | 5.5-13.2    | 4.5-10.3    | 4.9-10.5    | 4.8-11.6    | 5.5-12.1    | 6.3-11.7    |
|                                                            | 89                                     | 96               | 97          | 96          | 97          | 97          | 96          | 97          | 98          | 97          |
| <b>C-reactive protein, mg/L <sup>b</sup></b>               | <b>65</b>                              | <b>64</b>        | <b>65</b>   | <b>73</b>   | <b>77</b>   | <b>57</b>   | <b>69</b>   | <b>63</b>   | <b>95</b>   | <b>131</b>  |
|                                                            | 27-133                                 | 28-125           | 28-133      | 34-149      | 17-123      | 25-143      | 33-144      | 20-131      | 43-162      | 64-241      |
|                                                            | 87                                     | 97               | 97          | 96          | 97          | 98          | 96          | 97          | 98          | 93          |

| Variable                                                       | SARS-CoV-2 (1721)           | Influenza (2468)            | RSV (624)                   | RV (682)                    | EV (30)                     | PIV (247)                   | MPV (211)                   | S-CoV (183)                 | AdV (43)                    | BoV (30)                    |
|----------------------------------------------------------------|-----------------------------|-----------------------------|-----------------------------|-----------------------------|-----------------------------|-----------------------------|-----------------------------|-----------------------------|-----------------------------|-----------------------------|
| <b>Creatinine,</b><br>µmol/L <sup>b</sup>                      | <b>78</b><br>63-97<br>87    | <b>86</b><br>67-118<br>95   | <b>88</b><br>68-117<br>96   | <b>79</b><br>62-105<br>93   | <b>79</b><br>64-105<br>97   | <b>83</b><br>67-105<br>96   | <b>84</b><br>67-121<br>94   | <b>79</b><br>62-105<br>95   | <b>84</b><br>63-95<br>88    | <b>68</b><br>51-115<br>93   |
| <b>Platelet count,</b><br>10 <sup>9</sup> cells/L <sup>b</sup> | <b>204</b><br>158-260<br>89 | <b>176</b><br>137-224<br>95 | <b>195</b><br>138-257<br>97 | <b>201</b><br>123-270<br>96 | <b>218</b><br>175-278<br>93 | <b>184</b><br>133-240<br>97 | <b>189</b><br>147-240<br>96 | <b>206</b><br>141-275<br>97 | <b>214</b><br>156-291<br>98 | <b>181</b><br>123-298<br>97 |

a Worst value -24 to +24 hours from admission time point for each parameter. Analysis based on complete case analysis.

b Highest reported value per healthcare episode

c Lowest reported value per healthcare episode

d Irrespective of oxygen supplementation status

**Abbreviations:** SARS-CoV-2: Severe acute respiratory syndrome coronavirus 2, RSV: Respiratory syncytial virus, RV: Rhinovirus, EV: Enterovirus, PIV: Parainfluenzaviruses, MPV: Metapneumoviruses, sCoV: Seasonal coronavirus, AdV: Adenovirus, BoV: Bocavirus, SpO<sub>2</sub>: Peripheral capillary oxygen saturation, FiO<sub>2</sub>: Fraction of inspired oxygen, BP: Blood pressure, WBC: White blood cells

**eFigure 2. Density curves for vital signs and laboratory parameters**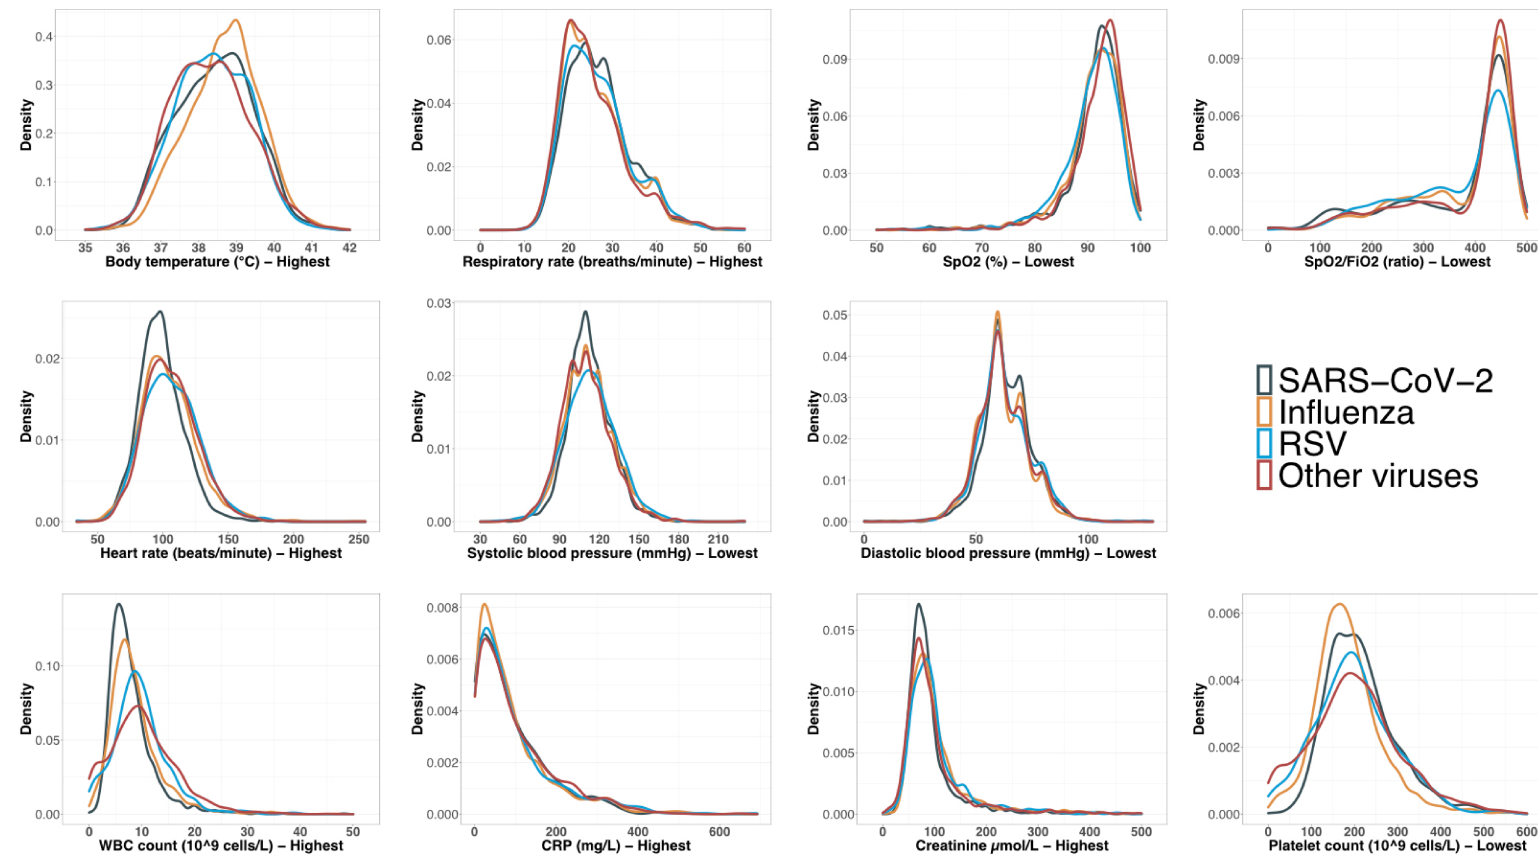

**Note:** Kernel density estimates of the laboratory parameter and vital sign distributions in the different virus groups per age category. Data based on complete case analysis.

**Abbreviations:** SARS-CoV-2: Severe acute respiratory syndrome coronavirus 2, RSV: Respiratory syncytial virus, SpO2: Peripheral capillary oxygen saturation, FiO2: Fraction of inspired oxygen, WBC: White blood cells, CRP: C-reactive protein

eTable 6. Laboratory parameters and vital signs in the different virus groups of the adult cohort

| Variable                                                         | Virus group (No. healthcare episodes) |                  |                  |                  | SARS-CoV-2 vs Influenza |                           | SARS-CoV-2 vs RSV       |                           | SARS-CoV-2 vs other viruses |                           |
|------------------------------------------------------------------|---------------------------------------|------------------|------------------|------------------|-------------------------|---------------------------|-------------------------|---------------------------|-----------------------------|---------------------------|
|                                                                  | SARS-CoV-2                            | Influenza        | RSV              | Other viruses    | OR (95% CI)             | aOR (95% CI) <sup>a</sup> | OR (95% CI)             | aOR (95% CI) <sup>a</sup> | OR (95% CI)                 | aOR (95% CI) <sup>a</sup> |
| <b>Vital signs</b>                                               |                                       |                  |                  |                  |                         |                           |                         |                           |                             |                           |
| <b>Body temperature, median (IQR), °C<sup>b</sup></b>            | 38.4 (37.7-39.1)                      | 38.7 (38.0-39.3) | 38.4 (37.7-39.1) | 38.3 (37.5-39.0) | -                       | -                         | -                       | -                         | -                           | -                         |
| Body temperature categories, n (%)                               |                                       |                  |                  |                  |                         |                           |                         |                           |                             |                           |
| <36                                                              | 103 (6)                               | 95 (4)           | 26 (4)           | 77 (5)           | 1.14 (0.83-1.56)        | 1.26 (0.91-1.75)          | 1.55 (0.97-2.48)        | <b>1.84 (1.13-2.99)</b>   | 1.38 (1.00-1.92)            | 1.40 (1.00-1.96)          |
| 36-38                                                            | 575 (33)                              | 605 (25)         | 224 (36)         | 599 (39)         | 1.0 (ref)               | 1.0 (ref)                 | 1.0 (ref)               | 1.0 (ref)                 | 1.0 (ref)                   | 1.0 (ref)                 |
| >38                                                              | 1043 (61)                             | 1768 (72)        | 374 (60)         | 832 (55)         | <b>0.62 (0.54-0.72)</b> | <b>0.56 (0.48-0.65)</b>   | 1.09 (0.89-1.32)        | 1.01 (0.82-1.25)          | <b>1.31 (1.12-1.52)</b>     | <b>1.28 (1.09-1.50)</b>   |
| <b>Systolic blood pressure, median (IQR), mm Hg<sup>b</sup></b>  | 110 (101-121)                         | 110 (100-122)    | 111 (100-126)    | 110 (98-120)     | -                       | -                         | -                       | -                         | -                           | -                         |
| <b>Diastolic blood pressure, median (IQR), mm Hg<sup>b</sup></b> | 63 (58-70)                            | 60 (55-70)       | 60 (56-70)       | 60 (55-70)       | -                       | -                         | -                       | -                         | -                           | -                         |
| SBP/DBP categories, n (%)                                        |                                       |                  |                  |                  |                         |                           |                         |                           |                             |                           |
| SBP <90 mm Hg or DBP ≤60 mm Hg                                   | 761 (44)                              | 1390 (56)        | 337 (54)         | 812 (54)         | <b>0.61 (0.54-0.70)</b> | <b>0.71 (0.62-0.81)</b>   | <b>0.68 (0.56-0.82)</b> | 0.86 (0.70-1.05)          | <b>0.68 (0.59-0.78)</b>     | <b>0.71 (0.61-0.82)</b>   |
| <b>Heart rate, median (IQR), beats/min<sup>b</sup></b>           | 97 (87-109)                           | 102 (90-117)     | 105 (90-120)     | 105 (92-120)     | -                       | -                         | -                       | -                         | -                           | -                         |
| Heart rate categories, n (%)                                     |                                       |                  |                  |                  |                         |                           |                         |                           |                             |                           |
| >90                                                              | 1134 (66)                             | 1786 (72)        | 465 (75)         | 1156 (77)        | <b>0.74 (0.64-0.85)</b> | <b>0.66 (0.58-0.77)</b>   | <b>0.66 (0.53-0.81)</b> | <b>0.58 (0.44-0.72)</b>   | <b>0.59 (0.50-0.69)</b>     | <b>0.58 (0.49-0.68)</b>   |
| <b>Respiratory rate, median (IQR), breaths/min<sup>b</sup></b>   | 25 (21-30)                            | 24 (20-30)       | 25 (20-30)       | 24 (20-30)       | -                       | -                         | -                       | -                         | -                           | -                         |
| Respiratory rate categories, n (%)                               |                                       |                  |                  |                  |                         |                           |                         |                           |                             |                           |
| <20                                                              | 415 (24)                              | 753 (31)         | 167 (27)         | 495 (33)         | 1.0 (ref)               | 1.0 (ref)                 | 1.0 (ref)               | 1.0 (ref)                 | 1.0 (ref)                   | 1.0 (ref)                 |
| 21-29                                                            | 783 (46)                              | 1034 (42)        | 265 (43)         | 622 (41)         | <b>1.37 (1.17-1.61)</b> | <b>1.53 (1.30-1.81)</b>   | 1.19 (0.94-1.50)        | <b>1.57 (1.22-2.03)</b>   | <b>1.50 (1.26-1.79)</b>     | <b>1.51 (1.26-1.81)</b>   |
| ≥30                                                              | 524 (30)                              | 680 (28)         | 191 (31)         | 390 (26)         | <b>1.40 (1.18-1.66)</b> | <b>1.64 (1.37-1.97)</b>   | 1.11 (0.86-1.42)        | <b>1.52 (1.16-2.00)</b>   | <b>1.60 (1.32-1.94)</b>     | <b>1.60 (1.31-1.95)</b>   |
| <b>SpO<sub>2</sub>, median (IQR), %<sup>b</sup></b>              | 93 (90-95)                            | 92 (89-95)       | 92 (88-94)       | 93 (90-95)       | -                       | -                         | -                       | -                         | -                           | -                         |
| SpO <sub>2</sub> categories, n (%)                               |                                       |                  |                  |                  |                         |                           |                         |                           |                             |                           |
| <90                                                              | 401 (23)                              | 670 (27)         | 204 (33)         | 340 (23)         | <b>0.81 (0.67-0.97)</b> | 1.04 (0.85-1.28)          | <b>0.51 (0.39-0.67)</b> | 0.83 (0.62-1.11)          | 1.19 (0.97-1.47)            | 1.23 (0.99-1.54)          |
| 90-94                                                            | 811 (47)                              | 1109 (45)        | 288 (46)         | 654 (43)         | 0.99 (0.83-1.18)        | 1.19 (0.99-1.45)          | <b>0.73 (0.57-0.95)</b> | 1.04 (0.80-1.36)          | 1.25 (1.04-1.51)            | <b>1.28 (1.04-1.57)</b>   |

| Variable                                                                | Virus group (No. healthcare episodes) |                |                |                | SARS-CoV-2 vs Influenza           |                                   | SARS-CoV-2 vs RSV                 |                                   | SARS-CoV-2 vs other viruses       |                                   |
|-------------------------------------------------------------------------|---------------------------------------|----------------|----------------|----------------|-----------------------------------|-----------------------------------|-----------------------------------|-----------------------------------|-----------------------------------|-----------------------------------|
|                                                                         | SARS-CoV-2                            | Influenza      | RSV            | Other viruses  | OR (95% CI)                       | aOR (95% CI) <sup>a</sup>         | OR (95% CI)                       | aOR (95% CI) <sup>a</sup>         | OR (95% CI)                       | aOR (95% CI) <sup>a</sup>         |
| >95                                                                     | 509 (30)                              | 688 (28)       | 132 (21)       | 515 (34)       | 1.0 (ref)                         |
| <b>SpO<sub>2</sub>/FiO<sub>2</sub>, median (IQR), ratio<sup>b</sup></b> | 438 (304-452)                         | 432 (311-452)  | 419 (297-448)  | 438 (328-452)  | -                                 | -                                 | -                                 | -                                 | -                                 | -                                 |
| SpO <sub>2</sub> /FiO <sub>2</sub> categories, n (%)                    |                                       |                |                |                |                                   |                                   |                                   |                                   |                                   |                                   |
| <235                                                                    | 241 (14)                              | 287 (12)       | 95 (15)        | 189 (13)       | <b>1.22</b><br><b>(1.01-1.47)</b> | <b>1.38</b><br><b>(1.13-1.68)</b> | 0.88<br>(0.68-1.15)               | 1.02<br>(0.77-1.35)               | 1.15<br>(0.94-1.42)               | 1.14<br>(0.92-1.41)               |
| 235-315                                                                 | 213 (12)                              | 332 (14)       | 82 (13)        | 169 (11)       | 0.93<br>(0.77-1.13)               | 1.03<br>(0.85-1.26)               | 0.91<br>(0.69-1.20)               | 1.06<br>(0.79-1.43)               | 1.15<br>(0.92-1.43)               | 1.14<br>(0.91-1.43)               |
| >315                                                                    | 1267 (74)                             | 1848 (75)      | 446 (71)       | 1150 (76)      | 1.0 (ref)                         |
| <b>Laboratory parameters</b>                                            |                                       |                |                |                |                                   |                                   |                                   |                                   |                                   |                                   |
| <b>CRP, median (IQR), mg/L<sup>b</sup></b>                              | 63 (25-130)                           | 64 (28-125)    | 65 (28-134)    | 68 (29-144)    | -                                 | -                                 | -                                 | -                                 | -                                 | -                                 |
| CRP categories, n (%)                                                   |                                       |                |                |                |                                   |                                   |                                   |                                   |                                   |                                   |
| <50                                                                     | 722 (42)                              | 1004 (41)      | 259 (42)       | 562 (37)       | 1.0 (ref)                         |
| 50-99                                                                   | 418 (24)                              | 652 (26)       | 147 (24)       | 377 (25)       | 0.89<br>(0.76-1.05)               | 0.88<br>(0.75-1.04)               | 1.02<br>(0.80-1.30)               | 1.01<br>(0.78-1.30)               | 0.86<br>(0.72-1.04)               | 0.86<br>(0.72-1.04)               |
| 100-149                                                                 | 242 (14)                              | 310 (13)       | 88 (14)        | 214 (14)       | 1.09<br>(0.89-1.33)               | 1.07<br>(0.86-1.32)               | 0.99<br>(0.74-1.33)               | 0.97<br>(0.71-1.32)               | 0.88<br>(0.71-1.10)               | 0.86<br>(0.68-1.08)               |
| 150-199                                                                 | 146 (8)                               | 195 (8)        | 41 (6)         | 128 (9)        | 1.04<br>(0.81-1.32)               | 1.00<br>(0.78-1.28)               | 1.29<br>(0.88-1.90)               | 1.35<br>(0.90-2.02)               | 0.89<br>(0.68-1.16)               | 0.86<br>(0.65-1.12)               |
| ≥200                                                                    | 194 (11)                              | 308 (13)       | 89 (14)        | 227 (15)       | 0.88<br>(0.71-1.09)               | <b>0.78</b><br><b>(0.62-0.97)</b> | 0.78<br>(0.58-1.05)               | <b>0.69</b><br><b>(0.50-0.95)</b> | <b>0.67</b><br><b>(0.53-0.84)</b> | <b>0.65</b><br><b>(0.51-0.83)</b> |
| <b>WBC count, median (IQR), 10<sup>9</sup> cells/L<sup>b</sup></b>      | 6.9 (5.1-9.5)                         | 7.7 (5.5-10.5) | 9.0 (6.5-12.2) | 9.6 (5.9-13.7) | -                                 | -                                 | -                                 | -                                 | -                                 | -                                 |
| WBC count categories, n (%)                                             |                                       |                |                |                |                                   |                                   |                                   |                                   |                                   |                                   |
| <4.0                                                                    | 179 (10)                              | 258 (11)       | 75 (12)        | 228 (15)       | 0.85<br>(0.69-1.06)               | 0.80<br>(0.64-1.01)               | <b>0.52</b><br><b>(0.38-0.71)</b> | <b>0.46</b><br><b>(0.33-0.65)</b> | <b>0.34</b><br><b>(0.27-0.33)</b> | <b>0.35</b><br><b>(0.28-0.44)</b> |
| 4.0-8.8                                                                 | 1028 (60)                             | 1265 (51)      | 222 (36)       | 447 (30)       | 1.0 (ref)                         |
| 8.9-12.0                                                                | 302 (18)                              | 505 (21)       | 169 (27)       | 337 (22)       | <b>0.74</b><br><b>(0.62-0.88)</b> | <b>0.76</b><br><b>(0.64-0.91)</b> | <b>0.38</b><br><b>(0.30-0.49)</b> | <b>0.39</b><br><b>(0.30-0.51)</b> | <b>0.39</b><br><b>(0.32-0.48)</b> | <b>0.39</b><br><b>(0.32-0.48)</b> |
| >12                                                                     | 212 (12)                              | 440 (18)       | 158 (25)       | 496 (33)       | <b>0.59</b><br><b>(0.49-0.72)</b> | <b>0.61</b><br><b>(0.50-0.74)</b> | <b>0.29</b><br><b>(0.22-0.37)</b> | <b>0.30</b><br><b>(0.22-0.39)</b> | <b>0.19</b><br><b>(0.15-0.23)</b> | <b>0.19</b><br><b>(0.16-0.24)</b> |
| <b>Platelet count, median (IQR), 10<sup>9</sup> cells/L<sup>b</sup></b> | 206 (159-262)                         | 176 (137-224)  | 195 (139-257)  | 196 (133-261)  | -                                 | -                                 | -                                 | -                                 | -                                 | -                                 |
| Platelet count categories, n (%)                                        |                                       |                |                |                |                                   |                                   |                                   |                                   |                                   |                                   |
| <150                                                                    | 333 (19)                              | 814 (33)       | 178 (29)       | 459 (31)       | <b>0.49</b><br><b>(0.42-0.57)</b> | <b>0.46</b><br><b>(0.39-0.54)</b> | <b>0.60</b><br><b>(0.48-0.74)</b> | <b>0.57</b><br><b>(0.45-0.72)</b> | <b>0.55</b><br><b>(0.46-0.65)</b> | <b>0.55</b><br><b>(0.46-0.65)</b> |
| Creatinine categories, n (%)                                            |                                       |                |                |                |                                   |                                   |                                   |                                   |                                   |                                   |
| >100                                                                    | 378 (22)                              | 883 (36)       | 223 (36)       | 448 (30)       | <b>0.50</b><br><b>(0.44-0.58)</b> | <b>0.53</b><br><b>(0.46-0.63)</b> | <b>0.51</b><br><b>(0.41-0.62)</b> | <b>0.69</b><br><b>(0.55-0.87)</b> | <b>0.66</b><br><b>(0.56-0.78)</b> | <b>0.63</b><br><b>(0.53-0.75)</b> |



a Analyses were adjusted for age and sex

b Variable containing missing values, which were imputed using multiple imputation by chained equations (MICE) by Predictive Mean Modelling (PMM). Descriptive data were calculated for each of the 50 imputed datasets and the mean of each descriptive statistics is presented.

**Abbreviations:** SARS-CoV-2: Severe acute respiratory syndrome coronavirus 2, RSV: Respiratory syncytial virus, CI: Confidence Interval, OR: Odds Ratio, aOR: Adjusted Odds Ratio, BMI: Body Mass Index, CCI: Charlson Comorbidity Index, ECI: Elixhauser Comorbidity Index, SBP: Systolic blood pressure, DBP: Diastolic blood pressure, SpO2: Peripheral capillary oxygen saturation, FiO2: Fraction of inspired oxygen, CRP: C-reactive protein, WBC: White blood cells

**eFigure 3. Presence of fever and dyspnea at admission in the adult and pediatric study cohort by virus group**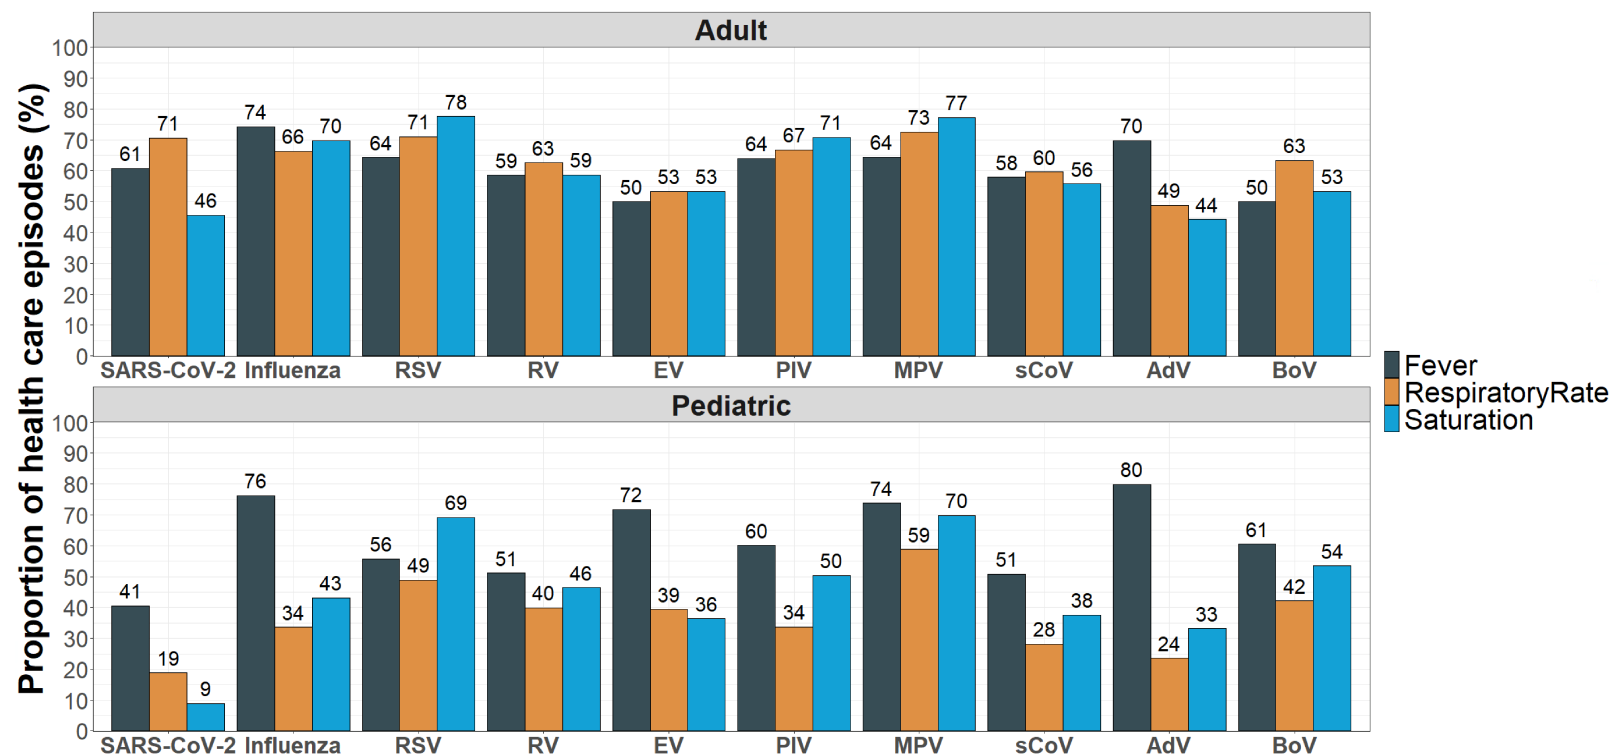

**Note:** Fever was defined as a body temperature of  $\geq 38$  °C on admission. Increased respiratory rate was defined as respiratory rate depending on age as follows:  $>60$  for  $<12$  months old,  $>40$  for 1-3 year old,  $>34$  for 4-5 year old,  $>30$  for 6-12 year old, and  $>20$  for  $>12$  year old, on admission. Decreased Saturation was defined as a peripheral oxygen saturation of  $<95\%$  on admission.

**Abbreviations:** SARS-CoV-2: Severe acute respiratory syndrome coronavirus 2, RSV: Respiratory syncytial virus, RV: Rhinovirus, EV: Enterovirus, PIV: Parainfluenzaviruses, MPV: Metapneumoviruses, sCoV: Seasonal coronavirus, AdV: Adenovirus, BoV: Bocavirus

**eFigure 4. Virus prediction models for SARS-CoV-2 compared to influenza (A), RSV (B) and other respiratory viruses (C)**

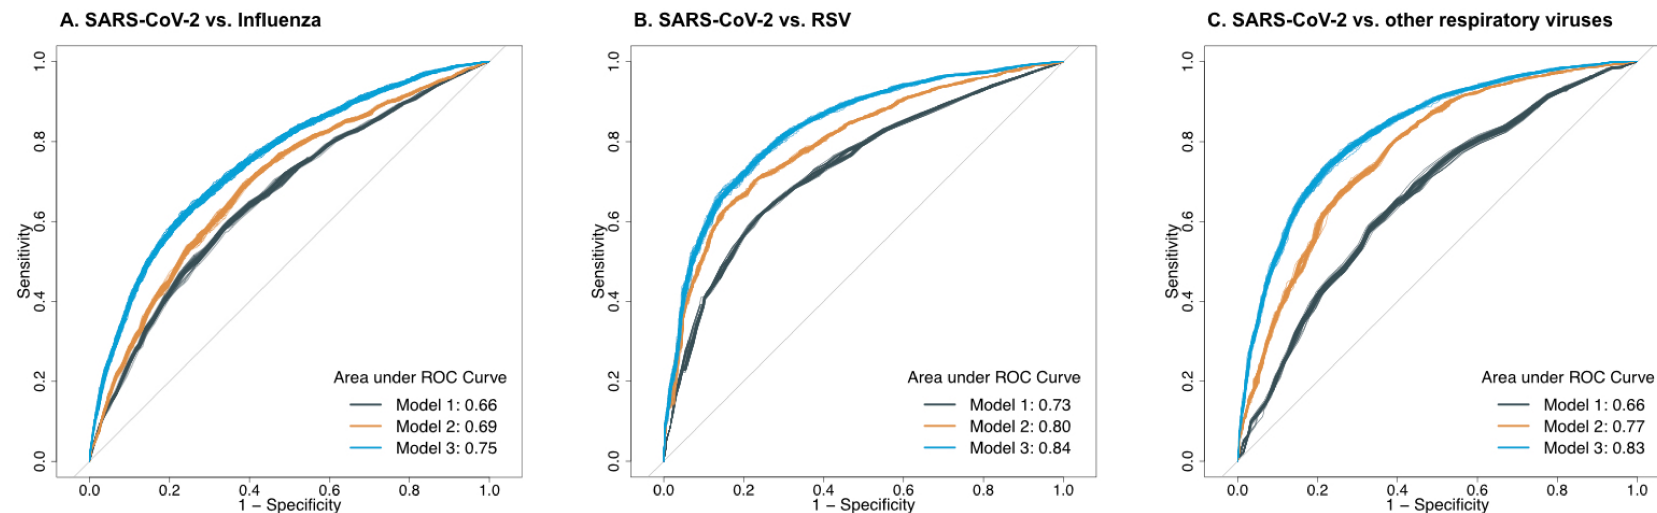

**Note:** Receiver operator characteristic (ROC) curves for model 1-3 in SARS-CoV-2 vs. Influenza (Panel A), SARS-CoV-2 vs. RSV (Panel B) and SARS-CoV-2 vs. other respiratory viruses (Panel C). Results from each of the 50 imputed datasets are shown as individual ROC-curves. The area under ROC curve estimate represents the mean of all 50 imputed datasets per model and virus group comparison. **Model 1:** Adjusted for age, sex and BMI. **Model 2:** Adjusted for age, sex BMI, diabetes, hypertension, chronic cardiac disease, chronic respiratory disease, chronic kidney disease, malignancy and immunosuppression. **Model 3:** Adjusted for age, sex, BMI, diabetes, hypertension, chronic cardiac disease, chronic respiratory disease, chronic kidney disease, malignancy, immunosuppression, CRP value, WBC count, platelet count, creatinine value, respiratory rate, SpO<sub>2</sub>/FiO<sub>2</sub>-ratio, body temperature, blood pressure and heart rate.

**Abbreviations:** SARS-CoV-2: Severe acute respiratory syndrome coronavirus 2, RSV: Respiratory syncytial virus, ROC: Receiver operator characteristic.

eTable 7. Logistic regression estimates for the virus prediction models

| Variable                            | SARS-CoV-2 vs. Influenza   |                            |                            | SARS-CoV-2 vs. RSV         |                            |                            | SARS-CoV-2 vs. other viruses |                            |                            |
|-------------------------------------|----------------------------|----------------------------|----------------------------|----------------------------|----------------------------|----------------------------|------------------------------|----------------------------|----------------------------|
|                                     | aOR (95% CI)               |                            |                            | aOR (95% CI)               |                            |                            | aOR (95% CI)                 |                            |                            |
|                                     | Model 1 <sup>a</sup>       | Model 2 <sup>b</sup>       | Model 3 <sup>c</sup>       | Model 1 <sup>a</sup>       | Model 2 <sup>b</sup>       | Model 3 <sup>c</sup>       | Model 1 <sup>a</sup>         | Model 2 <sup>b</sup>       | Model 3 <sup>c</sup>       |
| <b>Baseline characteristics</b>     |                            |                            |                            |                            |                            |                            |                              |                            |                            |
| Male sex                            | <b>1.48</b><br>(1.30-1.69) | <b>1.49</b><br>(1.30-1.70) | <b>1.76</b><br>(1.52-2.04) | <b>1.93</b><br>(1.58-2.36) | <b>1.98</b><br>(1.59-2.46) | <b>2.02</b><br>(1.59-2.55) | 1.13<br>(0.97-1.31)          | 1.14<br>(0.97-1.35)        | 1.11<br>(0.93-1.34)        |
| Age at admission, years             |                            |                            |                            |                            |                            |                            |                              |                            |                            |
| 16-39                               | 1.07<br>(0.86-1.32)        | 1.05<br>(0.84-1.31)        | 1.19<br>(0.94-1.51)        | <b>3.03</b><br>(1.97-4.67) | <b>2.91</b><br>(1.86-4.56) | <b>3.82</b><br>(2.37-6.17) | <b>0.74</b><br>(0.59-0.94)   | <b>0.58</b><br>(0.44-0.75) | <b>0.73</b><br>(0.55-0.97) |
| 40-49                               | 1.09<br>(0.84-1.40)        | 1.09<br>(0.84-1.41)        | 1.11<br>(0.84-1.46)        | 1.45<br>(0.92-2.27)        | 1.48<br>(0.92-2.37)        | 1.61<br>(0.98-2.65)        | 0.91<br>(0.69-1.21)          | 0.80<br>(0.59-1.10)        | 0.91<br>(0.65-1.28)        |
| 50-59                               | 1.0 (ref)                    | 1.0 (ref)                  | 1.0 (ref)                  |
| 60-69                               | <b>0.78</b><br>(0.63-0.97) | <b>0.76</b><br>(0.61-0.95) | <b>0.75</b><br>(0.60-0.95) | <b>0.58</b><br>(0.42-0.81) | <b>0.57</b><br>(0.40-0.81) | <b>0.56</b><br>(0.39-0.81) | <b>0.72</b><br>(0.57-0.92)   | <b>0.74</b><br>(0.56-0.96) | 0.78<br>(0.58-1.04)        |
| 70-79                               | <b>0.39</b><br>(0.31-0.49) | <b>0.37</b><br>(0.29-0.46) | <b>0.37</b><br>(0.29-0.47) | <b>0.31</b><br>(0.22-0.43) | <b>0.30</b><br>(0.21-0.43) | <b>0.30</b><br>(0.20-0.44) | <b>0.45</b><br>(0.35-0.58)   | <b>0.50</b><br>(0.38-0.67) | <b>0.62</b><br>(0.45-0.85) |
| ≥80                                 | <b>0.46</b><br>(0.37-0.57) | <b>0.41</b><br>(0.32-0.52) | <b>0.40</b><br>(0.31-0.52) | <b>0.39</b><br>(0.28-0.54) | <b>0.35</b><br>(0.24-0.50) | <b>0.34</b><br>(0.23-0.51) | 1.12<br>(0.86-1.48)          | 1.03<br>(0.75-1.41)        | 1.19<br>(0.84-1.67)        |
| BMI, kg/m <sup>2</sup> <sub>d</sub> |                            |                            |                            |                            |                            |                            |                              |                            |                            |
| Normoweight                         | 1.0 (ref)                    | 1.0 (ref)                  | 1.0 (ref)                  |
| Underweight                         | 0.67<br>(0.45-1.01)        | 0.69<br>(0.46-1.04)        | 0.68<br>(0.45-1.04)        | 0.59<br>(0.35-1.01)        | 0.61<br>(0.35-1.05)        | <b>0.54</b><br>(0.30-0.94) | <b>0.47</b><br>(0.31-0.69)   | <b>0.47</b><br>(0.31-0.71) | <b>0.51</b><br>(0.33-0.78) |
| Overweight                          | <b>1.55</b><br>(1.31-1.83) | <b>1.41</b><br>(1.19-1.67) | <b>1.44</b><br>(1.21-1.72) | <b>1.68</b><br>(1.31-2.15) | <b>1.32</b><br>(1.02-1.72) | 1.25<br>(0.94-1.66)        | <b>2.06</b><br>(1.71-2.47)   | <b>1.74</b><br>(1.42-2.14) | <b>1.68</b><br>(1.34-2.09) |
| Obese                               | <b>1.91</b><br>(1.60-2.28) | <b>1.68</b><br>(1.40-2.02) | <b>1.62</b><br>(1.33-1.97) | <b>1.67</b><br>(1.28-2.19) | 1.28<br>(0.96-1.71)        | 1.17<br>(0.86-1.61)        | <b>2.66</b><br>(2.16-3.26)   | <b>2.01</b><br>(1.60-2.52) | <b>1.77</b><br>(1.38-2.27) |
| <b>Comorbidities</b>                |                            |                            |                            |                            |                            |                            |                              |                            |                            |
| Diabetes mellitus <sup>e</sup>      | -                          | <b>1.23</b><br>(1.03-1.46) | <b>1.19</b><br>(0.99-1.43) | -                          | <b>1.60</b><br>(1.20-2.13) | <b>1.53</b><br>(1.13-2.06) | -                            | <b>1.29</b><br>(1.03-1.61) | <b>1.34</b><br>(1.06-1.70) |
| Hypertension <sup>e</sup>           | -                          | <b>1.60</b><br>(1.36-1.89) | <b>1.65</b><br>(1.39-1.97) | -                          | <b>2.12</b><br>(1.64-2.73) | <b>2.31</b><br>(1.77-3.03) | -                            | <b>1.86</b><br>(1.51-2.29) | <b>1.78</b><br>(1.43-2.23) |
| Cardiac disease <sup>e</sup>        | -                          | 0.89<br>(0.75-1.05)        | 0.90<br>(0.75-1.07)        | -                          | <b>0.69</b><br>(0.54-0.89) | <b>0.75</b><br>(0.57-0.98) | -                            | <b>0.68</b><br>(0.55-0.83) | <b>0.76</b><br>(0.61-0.95) |

| Variable                                             | SARS-CoV-2 vs. Influenza |                            |                            | SARS-CoV-2 vs. RSV   |                            |                            | SARS-CoV-2 vs. other viruses |                            |                            |
|------------------------------------------------------|--------------------------|----------------------------|----------------------------|----------------------|----------------------------|----------------------------|------------------------------|----------------------------|----------------------------|
|                                                      | Model 1 <sup>a</sup>     | aOR (95% CI)               |                            | Model 1 <sup>a</sup> | aOR (95% CI)               |                            | Model 1 <sup>a</sup>         | aOR (95% CI)               |                            |
|                                                      |                          | Model 2 <sup>b</sup>       | Model 3 <sup>c</sup>       |                      | Model 2 <sup>b</sup>       | Model 3 <sup>c</sup>       |                              | Model 2 <sup>b</sup>       | Model 3 <sup>c</sup>       |
| Chronic pulmonary disease <sup>e</sup>               | -                        | <b>0.72</b><br>(0.60-0.86) | <b>0.70</b><br>(0.58-0.84) | -                    | <b>0.60</b><br>(0.47-0.77) | <b>0.61</b><br>(0.46-0.80) | -                            | <b>0.50</b><br>(0.40-0.61) | <b>0.51</b><br>(0.41-0.64) |
| Chronic Kidney failure <sup>e</sup>                  | -                        | 1.32<br>(0.93-1.88)        | <b>1.88</b><br>(1.28-2.75) | -                    | 1.46<br>(0.91-2.34)        | <b>1.93</b><br>(1.16-3.22) | -                            | <b>1.85</b><br>(1.28-2.67) | <b>2.25</b><br>(1.48-3.40) |
| Malignancy <sup>e</sup>                              | -                        | 0.98<br>(0.69-1.39)        | 1.03<br>(0.71-1.49)        | -                    | 0.83<br>(0.52-1.33)        | 0.76<br>(0.46-1.24)        | -                            | 0.77<br>(0.54-1.10)        | 0.70<br>(0.48-1.02)        |
| Immunosuppression <sup>e</sup>                       | -                        | <b>0.45</b><br>(0.31-0.63) | <b>0.48</b><br>(0.33-0.69) | -                    | <b>0.28</b><br>(0.17-0.45) | <b>0.28</b><br>(0.17-0.46) | -                            | <b>0.17</b><br>(0.12-0.25) | <b>0.18</b><br>(0.12-0.26) |
| <b>Vital signs</b>                                   |                          |                            |                            |                      |                            |                            |                              |                            |                            |
| Body temperature, °C <sup>d</sup>                    |                          |                            |                            |                      |                            |                            |                              |                            |                            |
| <36                                                  | -                        | -                          | <b>1.55</b><br>(1.09-2.22) | -                    | -                          | <b>2.67</b><br>(1.53-4.68) | -                            | -                          | <b>1.99</b><br>(1.33-2.99) |
| 36-38                                                | -                        | -                          | 1.0 (ref)                  | -                    | -                          | 1.0 (ref)                  | -                            | -                          | 1.0 (ref)                  |
| >38                                                  | -                        | -                          | <b>0.53</b><br>(0.44-0.62) | -                    | -                          | 0.95<br>(0.73-1.23)        | -                            | -                          | <b>1.50</b><br>(1.22-1.84) |
| Blood pressure SBP ≤90 or DBP ≤60, mmHg <sup>d</sup> | -                        | -                          | <b>0.82</b><br>(0.71-0.96) | -                    | -                          | 0.97<br>(0.77-1.23)        | -                            | -                          | <b>0.80</b><br>(0.66-0.96) |
| Heart rate >90, beats/min <sup>d</sup>               | -                        | -                          | <b>0.65</b><br>(0.55-0.76) | -                    | -                          | <b>0.57</b><br>(0.44-0.74) | -                            | -                          | <b>0.52</b><br>(0.43-0.65) |
| Respiratory rate, breaths/min <sup>d</sup>           |                          |                            |                            |                      |                            |                            |                              |                            |                            |
| ≤20                                                  | -                        | -                          | 1.0 (ref)                  | -                    | -                          | 1.0 (ref)                  | -                            | -                          | 1.0 (ref)                  |
| 21-29                                                | -                        | -                          | <b>1.87</b><br>(1.55-2.26) | -                    | -                          | <b>1.62</b><br>(1.20-2.18) | -                            | -                          | <b>1.45</b><br>(1.15-1.83) |
| ≥30                                                  | -                        | -                          | <b>2.02</b><br>(1.55-2.26) | -                    | -                          | <b>1.72</b><br>(1.21-2.45) | -                            | -                          | <b>1.59</b><br>(1.20-2.10) |

| Variable                                                   | SARS-CoV-2 vs. Influenza |                      |                                     | SARS-CoV-2 vs. RSV   |                      |                                     | SARS-CoV-2 vs. other viruses |                      |                                     |
|------------------------------------------------------------|--------------------------|----------------------|-------------------------------------|----------------------|----------------------|-------------------------------------|------------------------------|----------------------|-------------------------------------|
|                                                            | Model 1 <sup>a</sup>     | Model 2 <sup>b</sup> | Model 3 <sup>c</sup>                | Model 1 <sup>a</sup> | Model 2 <sup>b</sup> | Model 3 <sup>c</sup>                | Model 1 <sup>a</sup>         | Model 2 <sup>b</sup> | Model 3 <sup>c</sup>                |
| SpO <sub>2</sub> /FiO <sub>2</sub> , % <sup>d</sup>        |                          |                      |                                     |                      |                      |                                     |                              |                      |                                     |
| <235                                                       | -                        | -                    | <b>1.40</b><br>( <b>1.10-1.77</b> ) | -                    | -                    | 1.00<br>(0.71-1.41)                 | -                            | -                    | 1.07<br>(0.80-1.42)                 |
| 235-315                                                    | -                        | -                    | 0.97<br>(0.76-1.18)                 | -                    | -                    | 0.94<br>(0.66-1.33)                 | -                            | -                    | 0.92<br>(0.69-1.22)                 |
| >315                                                       | -                        | -                    | 1.0 (ref)                           | -                    | -                    | 1.0 (ref)                           | -                            | -                    | 1.0 (ref)                           |
| <b>Laboratory parameters</b>                               |                          |                      |                                     |                      |                      |                                     |                              |                      |                                     |
| CRP, mg/L <sup>d</sup>                                     |                          |                      |                                     |                      |                      |                                     |                              |                      |                                     |
| <50                                                        | -                        | -                    | 1.0 (ref)                           | -                    | -                    | 1.0 (ref)                           | -                            | -                    | 1.0 (ref)                           |
| 50-99                                                      | -                        | -                    | 1.04<br>(0.87-1.25)                 | -                    | -                    | 1.19<br>(0.88-1.61)                 | -                            | -                    | 0.87<br>(0.69-1.10)                 |
| 100-149                                                    | -                        | -                    | <b>1.28</b><br>( <b>1.01-1.62</b> ) | -                    | -                    | 1.13<br>(0.79-1.62)                 | -                            | -                    | 1.01<br>(0.76-1.35)                 |
| 150-199                                                    | -                        | -                    | 1.29<br>(0.97-1.72)                 | -                    | -                    | <b>2.02</b><br>( <b>1.26-3.26</b> ) | -                            | -                    | 1.15<br>(0.82-1.62)                 |
| ≥200                                                       | -                        | -                    | 1.02<br>(0.79-1.34)                 | -                    | -                    | 1.18<br>(0.79-1.76)                 | -                            | -                    | 0.95<br>(0.70-1.29)                 |
| WBC count, 10 <sup>9</sup> cells/L <sup>d</sup>            |                          |                      |                                     |                      |                      |                                     |                              |                      |                                     |
| <4.0                                                       | -                        | -                    | 1.26<br>(0.98-1.62)                 | -                    | -                    | 0.81<br>(0.55-1.19)                 | -                            | -                    | 0.81 (0.60-1.09)                    |
| 4.0-8.8                                                    | -                        | -                    | 1.0 (ref)                           | -                    | -                    | 1.0 (ref)                           | -                            | -                    | 1.0 (ref)                           |
| 8.9-12.0                                                   | -                        | -                    | <b>0.66</b><br>( <b>0.54-0.80</b> ) | -                    | -                    | <b>0.30</b><br>( <b>0.22-0.40</b> ) | -                            | -                    | <b>0.33</b><br>( <b>0.26-0.42</b> ) |
| >12                                                        | -                        | -                    | <b>0.57</b><br>( <b>0.45-0.72</b> ) | -                    | -                    | <b>0.23</b><br>( <b>0.17-0.32</b> ) | -                            | -                    | <b>0.19</b><br>( <b>0.15-0.24</b> ) |
| Platelet count < 150, 10 <sup>9</sup> cells/L <sup>d</sup> | -                        | -                    | <b>0.49</b><br>( <b>0.41-0.59</b> ) | -                    | -                    | <b>0.62</b><br>( <b>0.47-0.83</b> ) | -                            | -                    | <b>0.67</b><br>( <b>0.53-0.85</b> ) |
| Creatinine > 100, umol/L <sup>d</sup>                      | -                        | -                    | <b>0.50</b><br>( <b>0.41-0.61</b> ) | -                    | -                    | <b>0.67</b><br>( <b>0.50-0.90</b> ) | -                            | -                    | <b>0.69</b><br>( <b>0.54-0.89</b> ) |

a Adjusted for age, sex and BMI

b Adjusted for age, sex BMI, diabetes, hypertension, chronic cardiac disease, chronic respiratory disease, chronic kidney disease, malignancy and

immunosuppression. Due to missing values for BMI, pooled estimates and confidence intervals from 50 multiple imputed datasets are shown.

c Adjusted for age, sex BMI, diabetes, hypertension, chronic cardiac disease, chronic respiratory disease, chronic kidney disease, malignancy, immunosuppression, CRP, WBCs, platelets, creatinine, respiratory rate, saturation, body temperature, blood pressure and heart rate. Due to missing values for BMI, CRP, WBCs, platelets, creatinine, respiratory rate, saturation, body temperature, blood pressure and heart rate, pooled estimates and confidence intervals from 50 multiple imputed datasets are shown.

d Variable containing missing values, which were imputed using multiple imputation by chained equations (MICE) by Predictive Mean Modelling (PMM) (See eMethods 3 for more detailed information).

e Based on ICD-10 codes from -5 years to +24 hours from admission time point. See list of ICD-10 codes for each comorbidity category in E table 1.

**Abbreviations:** SARS-CoV-2: Severe acute respiratory syndrome coronavirus 2, RSV: Respiratory syncytial virus, aOR: Adjusted Odds Ratio, CI; Confidence Interval, BMI: Body Mass Index, SBP: Systolic blood pressure, DBP: Diastolic blood pressure, SpO<sub>2</sub>: Peripheral capillary oxygen saturation, FiO<sub>2</sub>: Fraction of inspired oxygen, CRP: C-reactive protein, WBC: White blood cells

**eTable 8. Sensitivity analyses for mortality and ICU-admission outcomes in the adult cohort**

| Outcome variable                | SARS-CoV-2                          | Influenza                          | RSV                               | Other viruses                     | SARS-CoV-2 vs. Influenza                  |                                           | SARS-CoV-2 vs. RSV                        |                                           | SARS-CoV-2 vs. other viruses              |                                           |
|---------------------------------|-------------------------------------|------------------------------------|-----------------------------------|-----------------------------------|-------------------------------------------|-------------------------------------------|-------------------------------------------|-------------------------------------------|-------------------------------------------|-------------------------------------------|
|                                 |                                     |                                    |                                   |                                   | HR (95% CI)                               | aHR (95% CI) <sup>a</sup>                 | HR (95% CI)                               | aHR (95% CI) <sup>a</sup>                 | HR (95% CI)                               | aHR (95% CI) <sup>a</sup>                 |
| <b>30-day mortality</b>         | <i>number (percent)</i><br>216 (13) | <i>number (percent)</i><br>121 (5) | <i>number (percent)</i><br>45 (7) | <i>number (percent)</i><br>76 (5) | <b>2.73</b><br>(2.18-3.41)                | <b>4.43</b><br>(3.51-5.59)                | <b>1.83</b><br>(1.33-2.53)                | <b>3.81</b><br>(2.72-5.34)                | <b>2.62</b> <sub>SEP</sub><br>(2.02-3.40) | <b>3.46</b> <sub>SEP</sub><br>(2.61-4.60) |
| 2015-2020                       | 216 (13)                            | 96 (5)                             | 35 (8)                            | 62 (5)                            | <b>2.60</b><br>(2.05-3.31)                | <b>4.79</b><br>(3.72-6.15)                | <b>1.72</b><br>(1.21-2.46)                | <b>4.02</b><br>(2.76-5.83)                | <b>2.66</b><br>(2.01-3.53)                | <b>3.85</b><br>(2.84-5.22)                |
| Symptomatic cohort <sup>b</sup> | 204 (15)                            | 105 (5)                            | 43 (7)                            | 62 (5)                            | <b>3.47</b> <sub>SEP</sub><br>(2.74-4.39) | <b>5.48</b><br>(4.29-7.01)                | <b>2.13</b> <sub>SEP</sub><br>(1.53-2.96) | <b>4.17</b><br>(2.95-5.89)                | <b>3.36</b><br>(2.53-4.46)                | <b>4.50</b><br>(3.30-6.12)                |
| SARS-CoV-2, February-April 2020 | 154 (16)                            | 121 (5)                            | 45 (7)                            | 76 (5)                            | <b>3.41</b><br>(2.69-4.33)                | <b>5.79</b><br>(4.49-7.46)                | <b>2.29</b><br>(1.64-3.19)                | <b>4.87</b><br>(3.42-6.94)                | <b>3.27</b><br>(2.48-4.30)                | <b>4.63</b><br>(3.41-6.29)                |
| SARS-CoV-2, May-September 2020  | 62 (8)                              | 121 (5)                            | 45 (7)                            | 76 (5)                            | <b>1.82</b><br>(1.34-2.48)                | <b>3.09</b><br>(2.22-4.30)                | 1.22<br>(0.83-1.80)                       | <b>3.00</b><br>(1.95-4.62)                | <b>1.75</b><br>(1.25-2.45)                | <b>2.60</b><br>(1.79-3.80)                |
| Patient index HCEs <sup>c</sup> | 202 (12)                            | 115 (5)                            | 44 (8)                            | 67 (5)                            | <b>2.64</b><br>(2.10-3.31)                | <b>4.39</b><br>(3.46-5.58)                | <b>1.65</b><br>(1.19-2.29)                | <b>3.47</b><br>(2.46-4.90)                | <b>2.50</b><br>(1.90-3.29)                | <b>3.30</b><br>(2.45-4.45)                |
| <b>90-day mortality</b>         | 235 (15)                            | 192 (8)                            | 65 (10)                           | 148 (10)                          | <b>2.02</b> <sub>SEP</sub><br>(1.67-2.44) | <b>3.34</b> <sub>SEP</sub><br>(2.73-4.08) | <b>1.48</b> <sub>SEP</sub><br>(1.13-1.95) | <b>3.13</b> <sub>SEP</sub><br>(2.34-4.18) | <b>1.56</b> <sub>SEP</sub><br>(1.27-1.92) | <b>2.28</b> <sub>SEP</sub><br>(1.82-2.86) |
| 2015-2020                       | 235 (15)                            | 152 (8)                            | 50 (11)                           | 126 (10)                          | <b>1.93</b><br>(1.57-2.36)                | <b>3.45</b><br>(2.78-4.27)                | <b>1.41</b><br>(1.04-1.91)                | <b>3.16</b><br>(2.29-4.35)                | <b>1.52</b><br>(1.22-1.89)                | <b>2.30</b><br>(1.81-2.91)                |
| Symptomatic cohort <sup>b</sup> | 223 (17)                            | 167 (7)                            | 62 (11)                           | 123 (10)                          | <b>2.51</b><br>(2.05-3.07)                | <b>3.96</b><br>(3.21-4.89)                | <b>1.69</b><br>(1.27-2.24)                | <b>3.28</b><br>(2.43-4.41)                | <b>1.93</b><br>(1.55-2.41)                | <b>2.79</b><br>(2.19-3.55)                |
| SARS-CoV-2, February-April 2020 | 167 (17)                            | 192 (8)                            | 65 (10)                           | 148 (10)                          | <b>2.36</b><br>(1.92-2.90)                | <b>4.00</b><br>(3.20-4.99)                | <b>1.73</b><br>(1.30-2.30)                | <b>3.70</b><br>(2.71-5.04)                | <b>1.83</b><br>(1.46-2.28)                | <b>2.80</b><br>(2.18-3.60)                |
| SARS-CoV-2, May-September 2020  | 68 (11)                             | 192 (8)                            | 65 (10)                           | 148 (10)                          | <b>1.49</b><br>(1.13-1.97)                | <b>2.36</b><br>(1.77-3.16)                | 1.10<br>(0.78-1.54)                       | <b>2.42</b><br>(1.66-3.53)                | 1.16<br>(0.87-1.54)                       | <b>1.77</b><br>(1.29-2.42)                |
| Patient index HCEs <sup>c</sup> | 220 (14)                            | 182 (8)                            | 61 (11)                           | 129 (10)                          | <b>1.95</b><br>(1.60-2.37)                | <b>3.31</b><br>(2.69-4.07)                | <b>1.39</b><br>(1.05-1.85)                | <b>2.97</b><br>(2.20-4.02)                | <b>1.51</b><br>(1.21-1.87)                | <b>2.18</b><br>(1.72-2.77)                |
| <b>ICU-admission</b>            | 294 (17)                            | 244 (10)                           | 72 (12)                           | 167 (11)                          | <b>1.70</b> <sub>SEP</sub><br>(1.43-2.01) | <b>1.46</b> <sub>SEP</sub><br>(1.22-1.75) | <b>1.52</b> <sub>SEP</sub><br>(1.18-1.97) | <b>1.28</b> <sub>SEP</sub><br>(0.96-1.69) | <b>1.53</b> <sub>SEP</sub><br>(1.27-1.85) | <b>1.32</b> <sub>SEP</sub><br>(1.07-1.64) |
| 2015-2020                       | 294 (17)                            | 175 (9)                            | 52 (11)                           | 135 (11)                          | <b>1.82</b><br>(1.51-2.20)                | <b>1.59</b><br>(1.30-1.95)                | <b>1.56</b><br>(1.16-2.10)                | 1.32<br>(0.96-1.81)                       | <b>1.58</b><br>(1.29-1.94)                | <b>1.33</b><br>(1.06-1.68)                |
| Symptomatic cohort <sup>b</sup> | 294 (22)                            | 244 (11)                           | 72 (12)                           | 167 (13)                          | <b>1.88</b><br>(1.59-2.24)                | <b>1.57</b><br>(1.30-1.88)                | <b>1.71</b><br>(1.32-2.22)                | <b>1.36</b><br>(1.03-1.80)                | <b>1.62</b><br>(1.34-1.96)                | <b>1.39</b><br>(1.12-1.73)                |



| Outcome variable                          | SARS-CoV-2 | Influenza | RSV     | Other viruses | SARS-CoV-2 vs. Influenza             |                            | SARS-CoV-2 vs. RSV                   |                            | SARS-CoV-2 vs. other viruses                |                            |
|-------------------------------------------|------------|-----------|---------|---------------|--------------------------------------|----------------------------|--------------------------------------|----------------------------|---------------------------------------------|----------------------------|
|                                           |            |           |         |               | HR (95% CI)                          | aHR (95% CI) <sup>a</sup>  | HR (95% CI)                          | aHR (95% CI) <sup>a</sup>  | HR (95% CI)                                 | aHR (95% CI) <sup>a</sup>  |
| SARS-CoV-2, February-April 2020           | 197 (20)   | 244 (10)  | 72 (12) | 167 (11)      | <b>1.96</b><br>(1.63-2.37)           | <b>1.63</b><br>(1.33-1.99) | <b>1.78</b><br>(1.34-2.30)           | <b>1.31</b><br>(0.97-1.78) | <b>1.77</b><br>(1.44-2.18)                  | <b>1.45</b><br>(1.14-1.83) |
| SARS-CoV-2, May-September 2020            | 97 (14)    | 244 (10)  | 72 (12) | 167 (11)      | <b>1.34</b><br>(1.06-1.70)           | <b>1.41</b><br>(1.10-1.80) | 1.19<br>(0.88-1.61)                  | 1.41<br>(1.00-1.99)        | 1.20<br>(0.94-1.55)                         | 1.31<br>(0.99-1.74)        |
| Patient index HCEs <sup>c</sup>           | 286 (17)   | 236 (10)  | 67 (12) | 149 (11)      | <b>1.68</b><br>(1.41-2.00)           | <b>1.45</b><br>(1.20-1.74) | <b>1.51</b><br>(1.15-1.96)           | 1.28<br>(0.95-1.71)        | <b>1.50</b><br>(1.23-1.83)                  | <b>1.27</b><br>(1.02-1.59) |
| <b>30-day mortality in the ICU-cohort</b> |            |           |         |               |                                      |                            |                                      |                            |                                             |                            |
| 2015-2020                                 | 77 (26)    | 47 (19)   | 18 (25) | 23 (14)       | 1.42 <sup>[SEP]</sup><br>(0.98-2.03) | <b>2.40</b><br>(1.58-3.64) | 1.04 <sup>[SEP]</sup><br>(0.62-1.74) | <b>2.87</b><br>(1.55-5.33) | <b>2.07</b> <sup>[SEP]</sup><br>(1.30-3.30) | <b>3.75</b><br>(2.15-6.54) |
| Symptomatic cohort <sup>b</sup>           | 77 (26)    | 47 (19)   | 18 (25) | 23 (14)       | 1.40<br>(0.94-2.10)                  | <b>2.27</b><br>(1.43-3.62) | 1.02<br>(0.57-1.84)                  | <b>2.78</b><br>(1.39-5.52) | <b>2.41</b><br>(1.41-4.14)                  | <b>4.28</b><br>(2.30-7.96) |
| SARS-CoV-2, February-April 2020           | 52 (26)    | 47 (19)   | 18 (25) | 23 (14)       | 1.42<br>(0.98-2.03)                  | <b>2.40</b><br>(1.58-3.65) | 1.04<br>(0.62-1.74)                  | <b>2.95</b><br>(1.58-5.50) | <b>2.07</b><br>(1.30-3.30)                  | <b>3.78</b><br>(2.15-6.63) |
| SARS-CoV-2, May-September 2020            | 25 (26)    | 47 (19)   | 18 (25) | 23 (14)       | 1.43<br>(0.96-2.12)                  | <b>2.66</b><br>(1.64-4.32) | 1.06<br>(0.62-1.81)                  | <b>3.22</b><br>(1.60-6.51) | <b>2.09</b><br>(1.28-3.42)                  | <b>4.49</b><br>(2.44-9.02) |
| Patient index HCEs <sup>c</sup>           | 73 (26)    | 46 (19)   | 18 (27) | 18 (12)       | 1.38<br>(0.96-1.99)                  | <b>1.85</b><br>(1.07-3.19) | 1.01<br>(0.55-1.86)                  | 2.01<br>(0.96-4.23)        | <b>2.03</b><br>(1.15-3.58)                  | <b>2.96</b><br>(1.52-5.76) |
|                                           |            |           |         |               | 1.38<br>(0.96-1.99)                  | <b>2.35</b><br>(1.55-3.58) | 0.99<br>(0.59-1.65)                  | <b>2.74</b><br>(1.47-5.10) | <b>2.10</b><br>(1.31-3.38)                  | <b>3.81</b><br>(2.17-6.72) |

a The regression models were adjusted for age, sex, BMI, diabetes, hypertension, chronic cardiac disease, chronic respiratory disease, chronic kidney disease, malignancy and immunosuppression Due to missing values for BMI, pooled estimates and confidence intervals from 50 multiple imputed datasets are shown.

b Symptomatic cohort defined as patients with admission temperature  $\geq 38^{\circ}\text{C}$ , or oxygen saturation  $< 95\%$ , or respiratory rate  $> 20$

c For each patient, only the first HCE was included for analysis

**Abbreviations:** SARS-CoV-2: Severe acute respiratory syndrome coronavirus 2, RSV: Respiratory syncytial virus, HR: Hazard ratio, aHR: Adjusted hazard ratio, CI: Confidence Interval

**eTable 9. Age stratified logistic regression analysis of 30-day mortality in the adult cohort**

| Outcome variable | SARS-CoV-2    | Influenza    | RSV       | Other viruses | SARS-CoV-2 vs. Influenza                  |                                                        | SARS-CoV-2 vs. RSV                        |                                                        | SARS-CoV-2 vs. other viruses              |                                                        |
|------------------|---------------|--------------|-----------|---------------|-------------------------------------------|--------------------------------------------------------|-------------------------------------------|--------------------------------------------------------|-------------------------------------------|--------------------------------------------------------|
|                  |               |              |           |               | HR (95% CI)                               | aHR (95% CI) <sup>a</sup>                              | HR (95% CI)                               | aHR (95% CI) <sup>a</sup>                              | HR (95% CI)                               | aHR (95% CI) <sup>a</sup>                              |
| 30-day mortality | 216/1692 (13) | 121/2468 (5) | 45/62 (7) | 76/1490 (5)   | <b>2.73</b> <sup>[1]</sup><br>(2.18-3.41) | <b>4.43</b> <sup>[1]</sup><br>(3.51-5.59) <sup>b</sup> | <b>1.83</b> <sup>[1]</sup><br>(1.33-2.53) | <b>3.81</b> <sup>[1]</sup><br>(2.72-5.34) <sup>b</sup> | <b>2.62</b> <sup>[1]</sup><br>(2.02-3.40) | <b>3.46</b> <sup>[1]</sup><br>(2.61-4.60) <sup>b</sup> |
| 16-49 years      | 8/579 (1)     | 4/587 (1)    | 3/69 (4)  | 12/511 (2)    | 2.03<br>(0.61-6.75)                       | <b>3.53</b><br>(1.01-12.40) <sup>c</sup>               | 0.31<br>(0.08-1.18)                       | 1.27<br>(0.29-5.47) <sup>c</sup>                       | 0.59<br>(0.24-1.44)                       | 1.22<br>(0.44-3.34) <sup>c</sup>                       |
| 50-69 years      | 48/668 (7)    | 26/729 (4)   | 10/20 (5) | 18/491 (4)    | <b>2.05</b><br>(1.27-3.30)                | <b>2.16</b><br>(1.31-3.57) <sup>c</sup>                | 1.51<br>(0.76-2.98)                       | 1.71<br>(0.81-3.60) <sup>c</sup>                       | <b>2.00</b><br>(1.16-3.44)                | <b>2.07</b><br>(1.13-3.79) <sup>c</sup>                |
| ≥70 years        | 160/445 (36)  | 91/1152 (8)  | 32/34 (9) | 46/488 (9)    | <b>5.51</b><br>(4.26-7.13)                | <b>5.41</b><br>(4.17-7.00) <sup>c</sup>                | <b>4.67</b><br>(3.19-6.82)                | <b>4.93</b><br>(3.37-7.23) <sup>c</sup>                | <b>4.49</b><br>(3.23-6.23)                | <b>5.03</b><br>(3.61-7.01) <sup>c</sup>                |

a Due to missing values for BMI, pooled estimates and confidence intervals from 50 multiple imputed datasets are shown.

b The regression models were adjusted for age, sex, BMI and Elixhauser Comorbidity Index Score

c The regression models were adjusted for sex, BMI and Elixhauser Comorbidity Index Score

**Abbreviations:** SARS-CoV-2: Severe acute respiratory syndrome coronavirus 2, RSV: Respiratory syncytial virus, HR: Hazard ratio, aHR: Adjusted hazard ratio, CI; Confidence Interval

**eFigure 5. Unadjusted Kaplan Meier curve (A) and standardized survival function curve (B) for 30-90 day mortality in the adult study cohort**

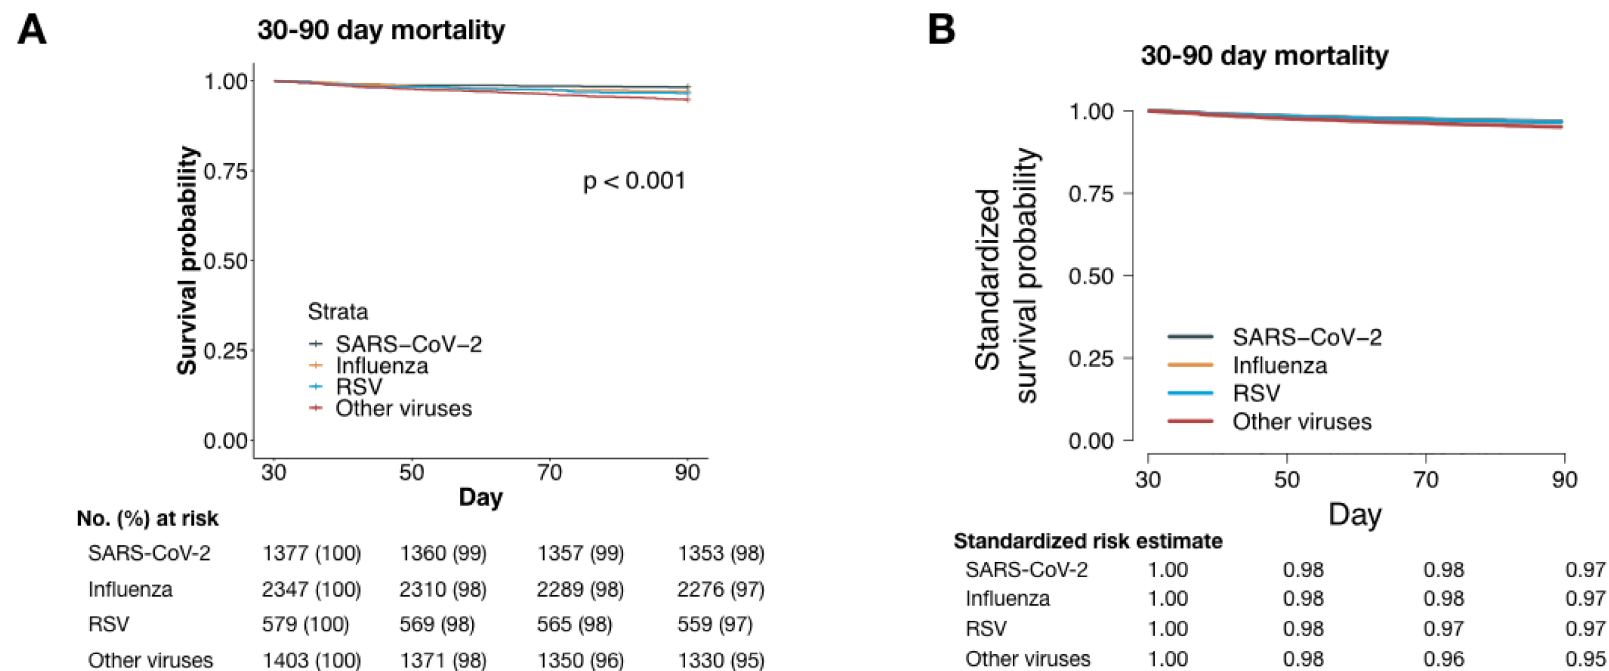

**Note:** A. Unadjusted Kaplan Meier curve and risk table for 30-90-day mortality. *P*-value represents result of significance testing using log-rank tests. B. Complete case-based standardised survival function for 30-90-day mortality. Complete data were available for 1024 SARS-CoV-2, 2220 influenza virus, 591 RSV and 1377 other viruses healthcare episodes. The survival function was standardized and adjusted for sex, age, BMI-category, diabetes, hypertension, cardiac disease, respiratory disease, chronic kidney disease and malignancy.

**Abbreviations:**

SARS-CoV-2: Severe acute respiratory syndrome coronavirus 2, RSV: Respiratory syncytial virus, AdV: Adenovirus, RV: Rhinovirus, EV: Enterovirus, sCoV: Seasonal coronavirus, BoV: Bocavirus, PIV: Parainfluenzaviruses, MPV: Metapneumoviruses

**eTable 10. Comparison of mortality hazard ratios for complete case and multiple imputed analysis in the adult cohort**

|                       | SARS-CoV-2 vs.<br>Influenza<br>aHR (95% CI) <sup>a</sup> | SARS-CoV-2 vs.<br>RSV<br>aHR (95% CI) <sup>a</sup> | SARS-CoV-2 vs. Other<br>viruses<br>aHR (95% CI) <sup>a</sup> |
|-----------------------|----------------------------------------------------------|----------------------------------------------------|--------------------------------------------------------------|
| <b>Mortality</b>      |                                                          |                                                    |                                                              |
| <b>Day 0-30</b>       |                                                          |                                                    |                                                              |
| Multiple Imputed data | <b>4.43 (3.51-5.59)</b>                                  | <b>3.81 (2.72-5.34)</b>                            | <b>3.46 (2.61-4.60)</b>                                      |
| Complete case         | <b>4.84 (3.75-6.24)</b>                                  | <b>4.47 (3.07-6.50)</b>                            | <b>3.99 (2.92-5.45)</b>                                      |
| <b>Day 0-90</b>       |                                                          |                                                    |                                                              |
| Multiple Imputed data | <b>3.34 (2.73-4.08)</b>                                  | <b>3.13 (2.34-4.18)</b>                            | <b>2.28 (1.82-2.86)</b>                                      |
| Complete case         | <b>3.55 (2.85-4.42)</b>                                  | <b>3.42 (2.50-4.69)</b>                            | <b>2.54 (1.98-3.24)</b>                                      |
| <b>Day 31-90</b>      |                                                          |                                                    |                                                              |
| Multiple Imputed data | 0.98 (0.60-1.59)                                         | 1.14 (0.59-2.19)                                   | 0.62 (0.37-1.03)                                             |
| Complete case         | 0.93 (0.54-1.61)                                         | 1.00 (0.50-2.01)                                   | 0.61 (0.35-1.08)                                             |

<sup>a</sup> The regression models were adjusted for age, sex, BMI, diabetes, hypertension, chronic cardiac disease, chronic respiratory disease, chronic kidney disease, malignancy and immunosuppression

**Abbreviations:** SARS-CoV-2: Severe acute respiratory syndrome coronavirus 2, RSV: Respiratory syncytial virus, HR: Hazard ratio, aHR: Adjusted hazard ratio, CI; Confidence Interval

**eFigure 6. Comparison of 30-day mortality, 90-day mortality and ICU-admission per calendar year in the adult influenza, RSV and other viruses groups**

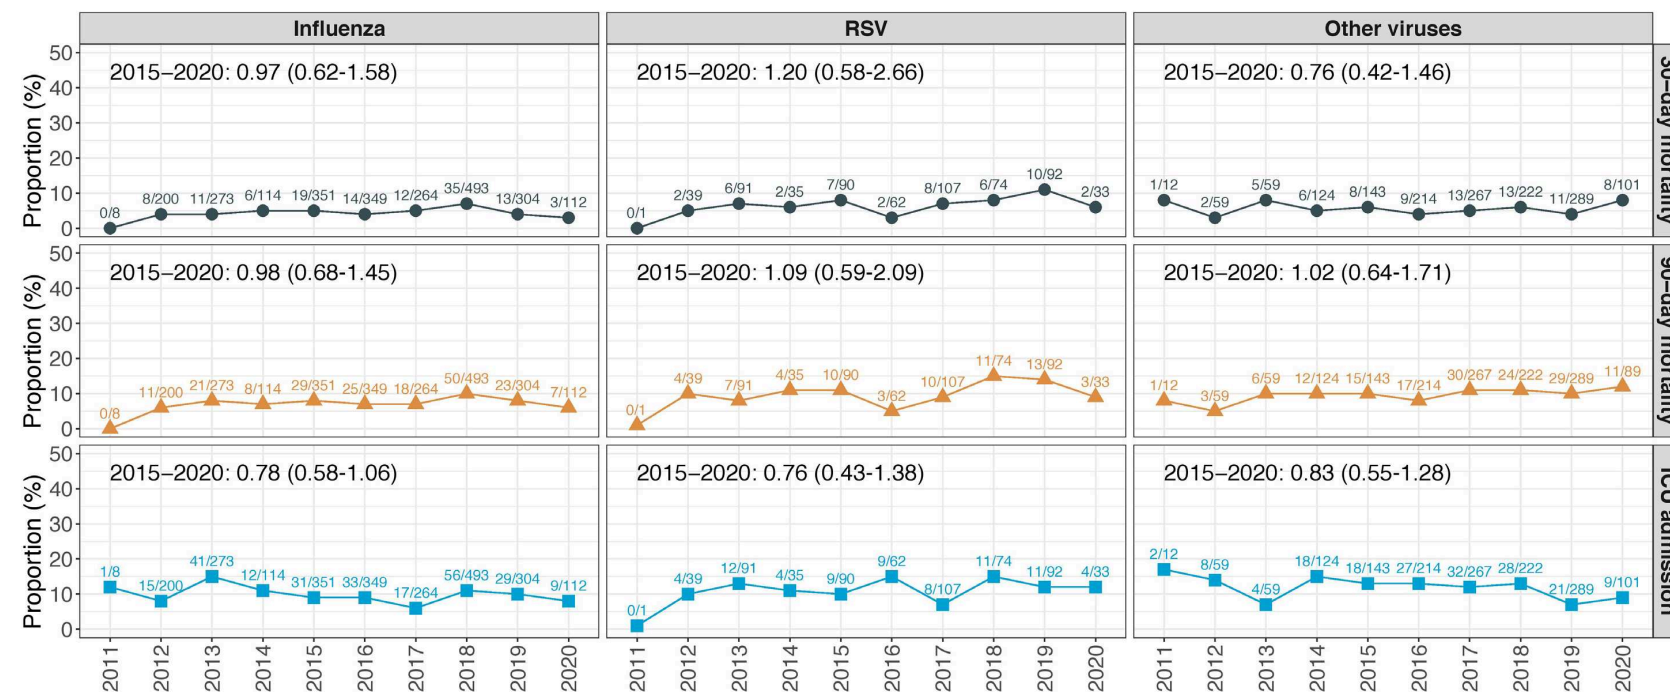

**Note:** The 30-day mortality, 90-day mortality and ICU-admission rates per calendar year in the adult influenza, RSV and other viruses groups. The numbers above each point indicates the number of events and the total number of health care episodes per unique calendar year. The age-category, sex, diabetes, hypertension, chronic cardiac disease, chronic respiratory disease, chronic kidney disease, malignancy and immunosuppression-adjusted odds ratio (95% CI) for 2015-2020 as compared to 2011-2014 for each outcome measure and virus group is presented in the top-left of each facet.

**Abbreviations:** RSV: Respiratory syncytial virus

## References

1. Tiveljung-Lindell A, Rotzén-Ostlund M, Gupta S, et al. Development and implementation of a molecular diagnostic platform for daily rapid detection of 15 respiratory viruses. *J Med Virol*. 2009;81(1):167-175. doi:10.1002/jmv.21368
2. Gasparini A. comorbidity: An R package for computing comorbidity scores. *J Open Source Softw*. 2018;3(23):648. doi:10.21105/joss.00648
3. Quan H, Sundararajan V, Halfon P, et al. Coding algorithms for defining comorbidities in ICD-9-CM and ICD-10 administrative data. *Med Care*. 2005;43(11):1130-1139. doi:10.1097/01.mlr.0000182534.19832.83
4. van Walraven C, Austin PC, Jennings A, Quan H, Forster AJ. A modification of the Elixhauser comorbidity measures into a point system for hospital death using administrative data. *Med Care*. 2009;47(6):626-633. doi:10.1097/MLR.0b013e31819432e5
5. Valik JK, Ward L, Tanushi H, et al. Validation of automated sepsis surveillance based on the Sepsis-3 clinical criteria against physician record review in a general hospital population: Observational study using electronic health records data. *BMJ Qual Saf*. 2020;29(9):735-745. doi:10.1136/bmjqs-2019-010123
6. Rice TW, Wheeler AP, Bernard GR, Hayden DL, Schoenfeld DA, Ware LB. Comparison of the SpO<sub>2</sub>/FIO<sub>2</sub> ratio and the PaO<sub>2</sub>/FIO<sub>2</sub> ratio in patients with acute lung injury or ARDS. *Chest*. 2007;132(2):410-417. doi:10.1378/chest.07-0617
7. van Buuren S, Groothuis-Oudshoorn K. mice: Multivariate imputation by chained equations in R. *J Stat Softw*. 2011;45(3):1-67. doi:10.18637/jss.v045.i03
8. Rubin DB. *Multiple Imputation for Nonresponse in Surveys*.; 1987.
